# Supplementary material for: Prognosis of lasso-like penalized Cox models with tumor profiling improves prediction over clinical data alone and benefits from bi-dimensional pre-screening
Source: Springer Nature journal article supplement (doi:10.1186/s12885-022-10117-1), 2022-10-05
Supplement: MOESM2 [file 12885_2022_10117_MOESM2_ESM.pdf]

# Supplementary Tables

| Cancer | Name                                                             |
|--------|------------------------------------------------------------------|
| LAML   | Acute Myeloid Leukemia                                           |
| ACC    | Adrenocortical carcinoma                                         |
| BLCA   | Bladder Urothelial Carcinoma                                     |
| LGG    | Brain Lower Grade Glioma                                         |
| BRCA   | Breast invasive carcinoma                                        |
| CESC   | Cervical squamous cell carcinoma and endocervical adenocarcinoma |
| CHOL   | Cholangiocarcinoma                                               |
| LCML   | Chronic Myelogenous Leukemia                                     |
| COAD   | Colon adenocarcinoma                                             |
| ESCA   | Esophageal carcinoma                                             |
| GBM    | Glioblastoma multiforme                                          |
| HNSC   | Head and Neck squamous cell carcinoma                            |
| KICH   | Kidney Chromophobe                                               |
| KIRC   | Kidney renal clear cell carcinoma                                |
| KIRP   | Kidney renal papillary cell carcinoma                            |
| LIHC   | Liver hepatocellular carcinoma                                   |
| LUAD   | Lung adenocarcinoma                                              |
| LUSC   | Lung squamous cell carcinoma                                     |
| DLBC   | Lymphoid Neoplasm Diffuse Large B-cell Lymphoma                  |
| MESO   | Mesothelioma                                                     |
| MISC   | Miscellaneous                                                    |
| OV     | Ovarian serous cystadenocarcinoma                                |
| PAAD   | Pancreatic adenocarcinoma                                        |
| PCPG   | Pheochromocytoma and Paraganglioma                               |
| PRAD   | Prostate adenocarcinoma                                          |
| READ   | Rectum adenocarcinoma                                            |
| SARC   | Sarcoma                                                          |
| SKCM   | Skin Cutaneous Melanoma                                          |
| STAD   | Stomach adenocarcinoma                                           |
| TGCT   | Testicular Germ Cell Tumors                                      |
| THYM   | Thymoma                                                          |
| THCA   | Thyroid carcinoma                                                |
| UCS    | Uterine Carcinosarcoma                                           |
| UCEC   | Uterine Corpus Endometrial Carcinoma                             |
| UVM    | Uveal Melanoma                                                   |

**Supplementary Tab. S1. Acronym of the TCGA cancers**
