# Supplementary material for: Prognosis of lasso-like penalized Cox models with tumor profiling improves prediction over clinical data alone and benefits from bi-dimensional pre-screening
Source: Springer Nature journal article supplement (doi:10.1186/s12885-022-10117-1), 2022-10-05
Supplement: MOESM3 [file 12885_2022_10117_MOESM3_ESM-1.pdf]

# Supplementary Figures

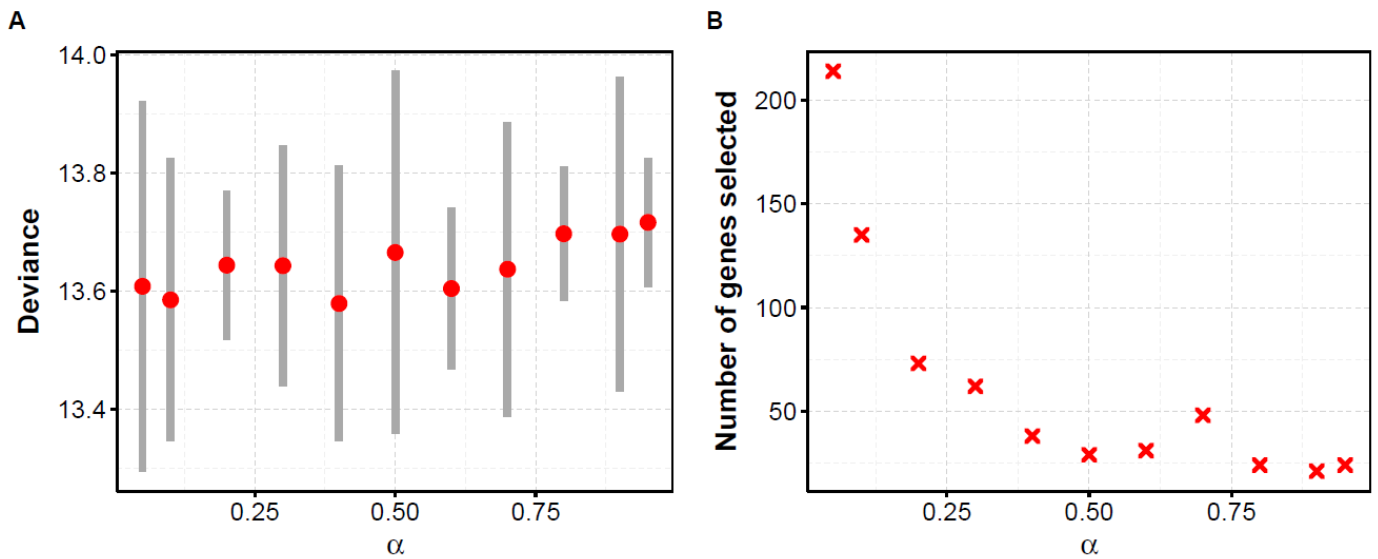

**Supplementary Fig. S1. Deviance and number of genes selected for different values of  $\alpha$  for BRCA.**

We computed the deviance by K-fold cross validation (K=5) for each value of  $\alpha$ .

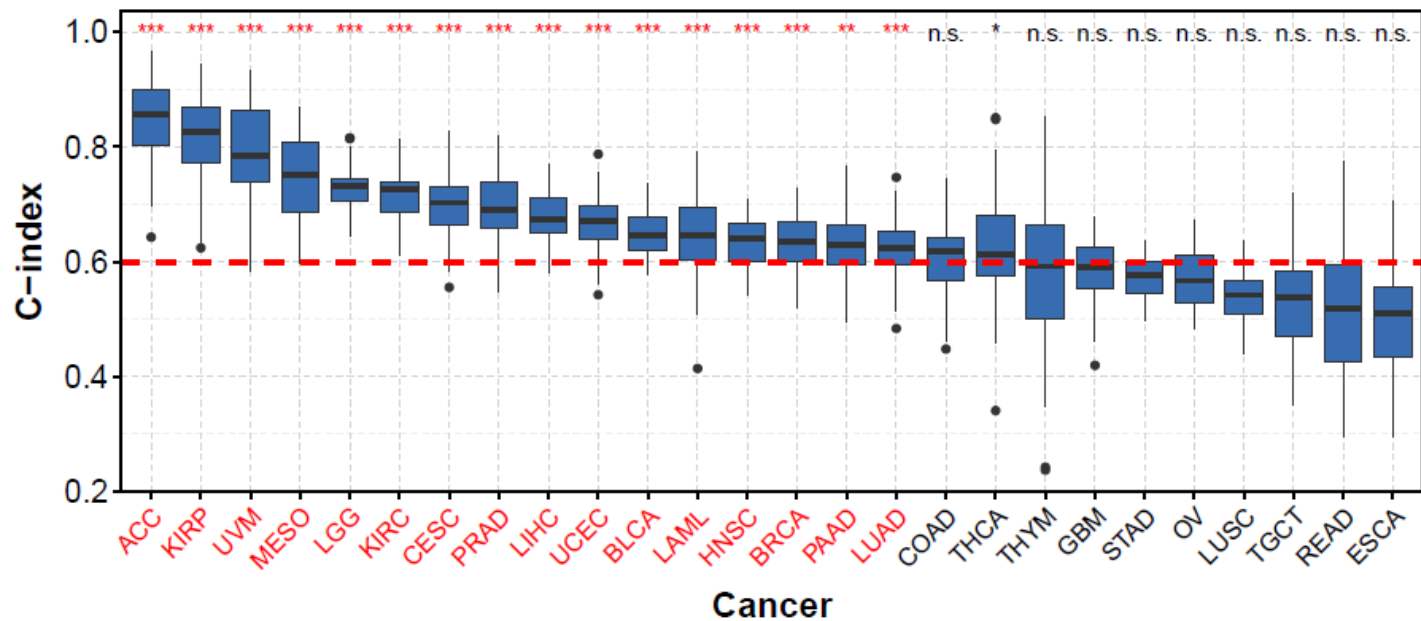

**Supplementary Fig. S2. Boxplot of the C-indices computed by 10 repetitions of a K-fold cross validation (K=5) for all the 26 cancers.**

We retained 16 cancers (red) that have a median C-index significantly above 0.6 according to a one-sided Wilcoxon test at level 0.01. We corrected the p-values with the Benjamini-Hochberg method (stars above the graphics).

Red dotted horizontal line : C-index of 0.6.

\*\*\*:  $p \leq 0.001$ , \*\*:  $p \leq 0.01$ , \*:  $p \leq 0.05$ , +:  $p \leq 0.1$ , n.s. :  $p > 0.1$

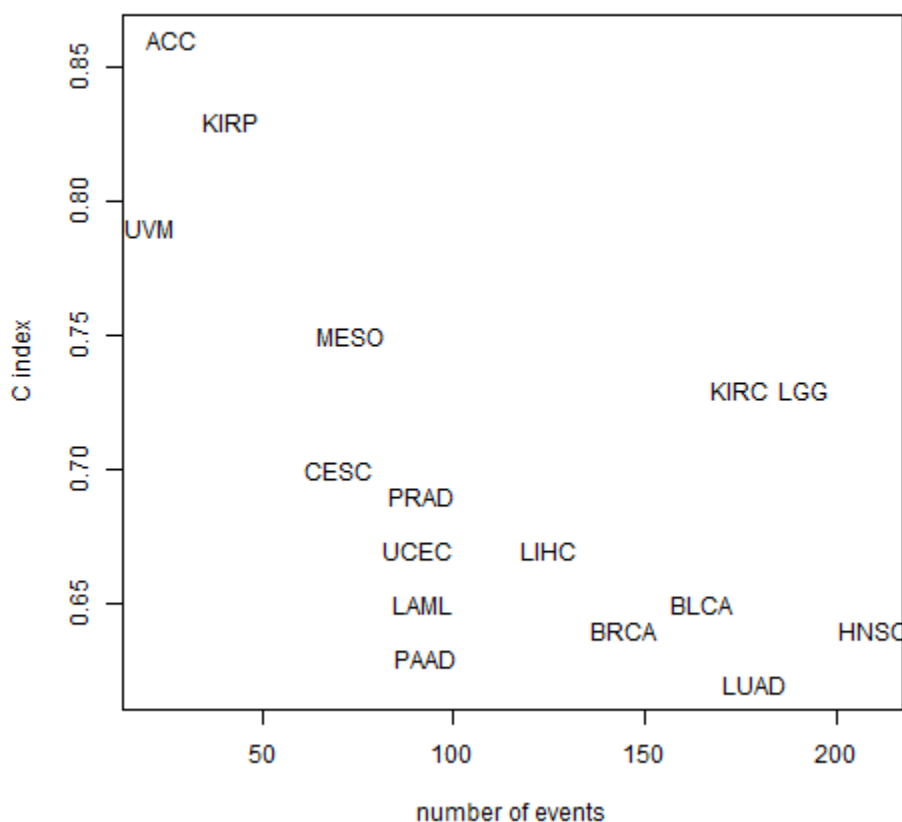

**Supplementary Fig. S3. Median C-index (as indicated Table 1) as a function of the number of events per cancer subtype.**

The codes for cancer subtypes are provided in Supplementary Tab. S1.

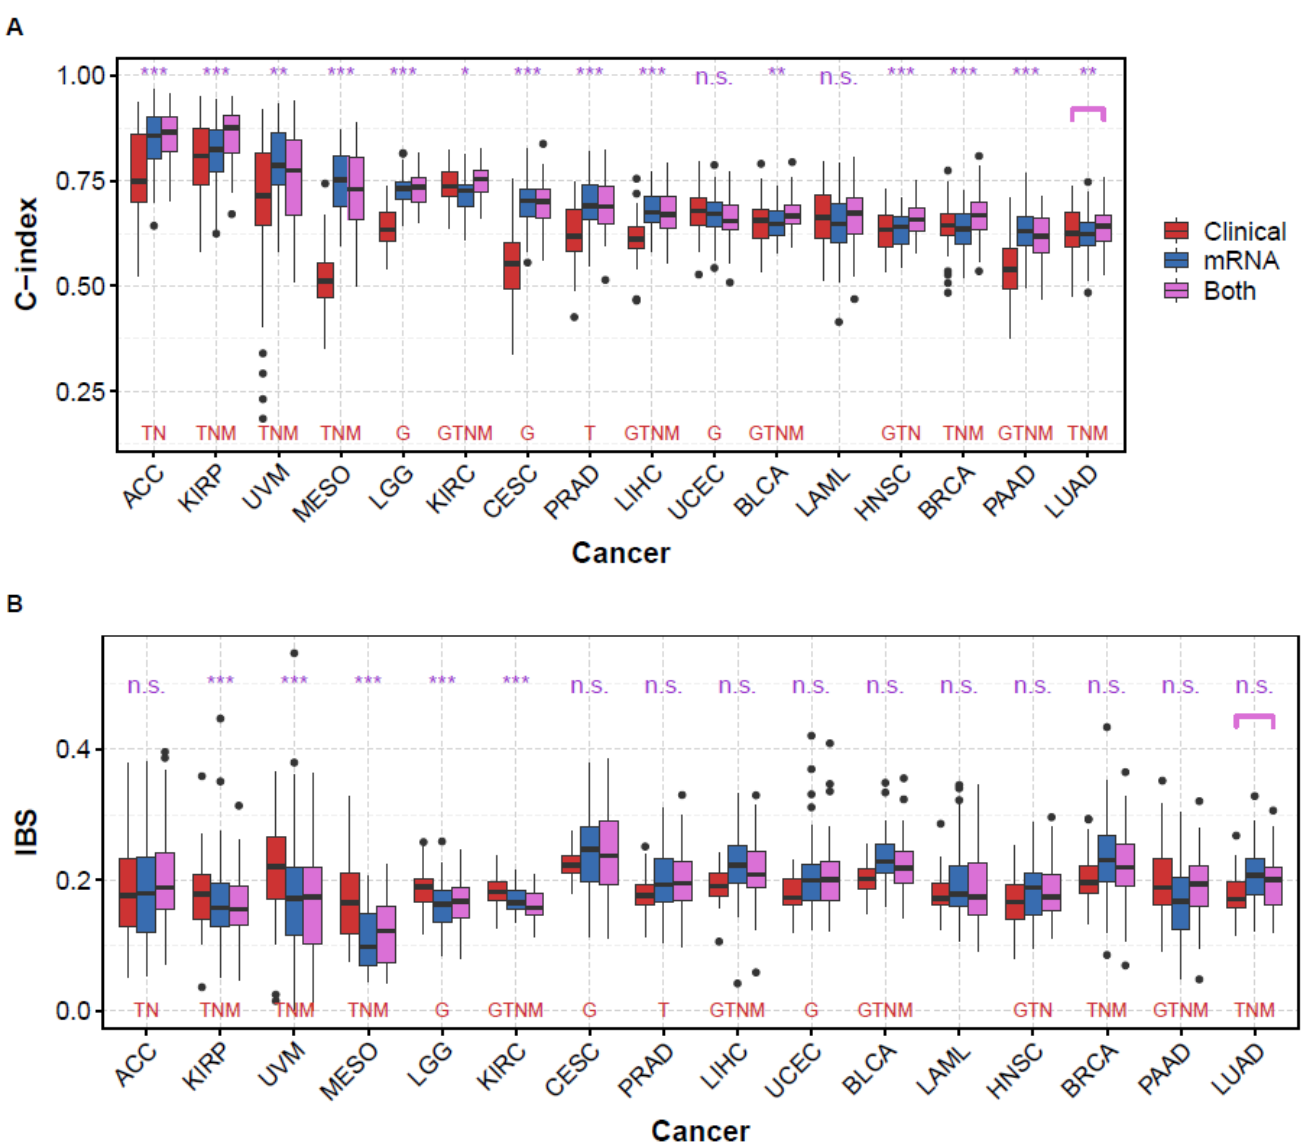

**Supplementary Fig. S4. C-indices (A) and IBS (B) obtained with clinical data alone (red), mRNA-seq data alone (blue), and clinical and mRNA-seq data together (purple) for the 16 cancers studied in terms of pre-screening.**

Procedure detailed in Figure 1. We computed the C-indices by 10 repetitions of a K-fold cross-validation (K=5). To evaluate whether the added value of mRNA-seq data for prediction is significant over clinical data alone, we computed the p-values of a one-sided Wilcoxon signed-rank test between clinical and both clinical+mRNA-seq (red versus pink boxplots, pink stars at the top of each graphic, Benjamini-Hochberg correction for the 26 p-values).

Red letters at the bottom of each graphics indicate the clinical data available (G: grade; T: tumor; N: node; M: metastasis). Age is available for all cancers, and gender only for non-unisexual cancers (CESC, PRAD, TGCT are sex-specific).

\*\*\*:  $p \leq 0.001$ , \*\*:  $p \leq 0.01$ , \*:  $p \leq 0.05$ , +:  $p \leq 0.1$ , n.s. :  $p > 0.1$

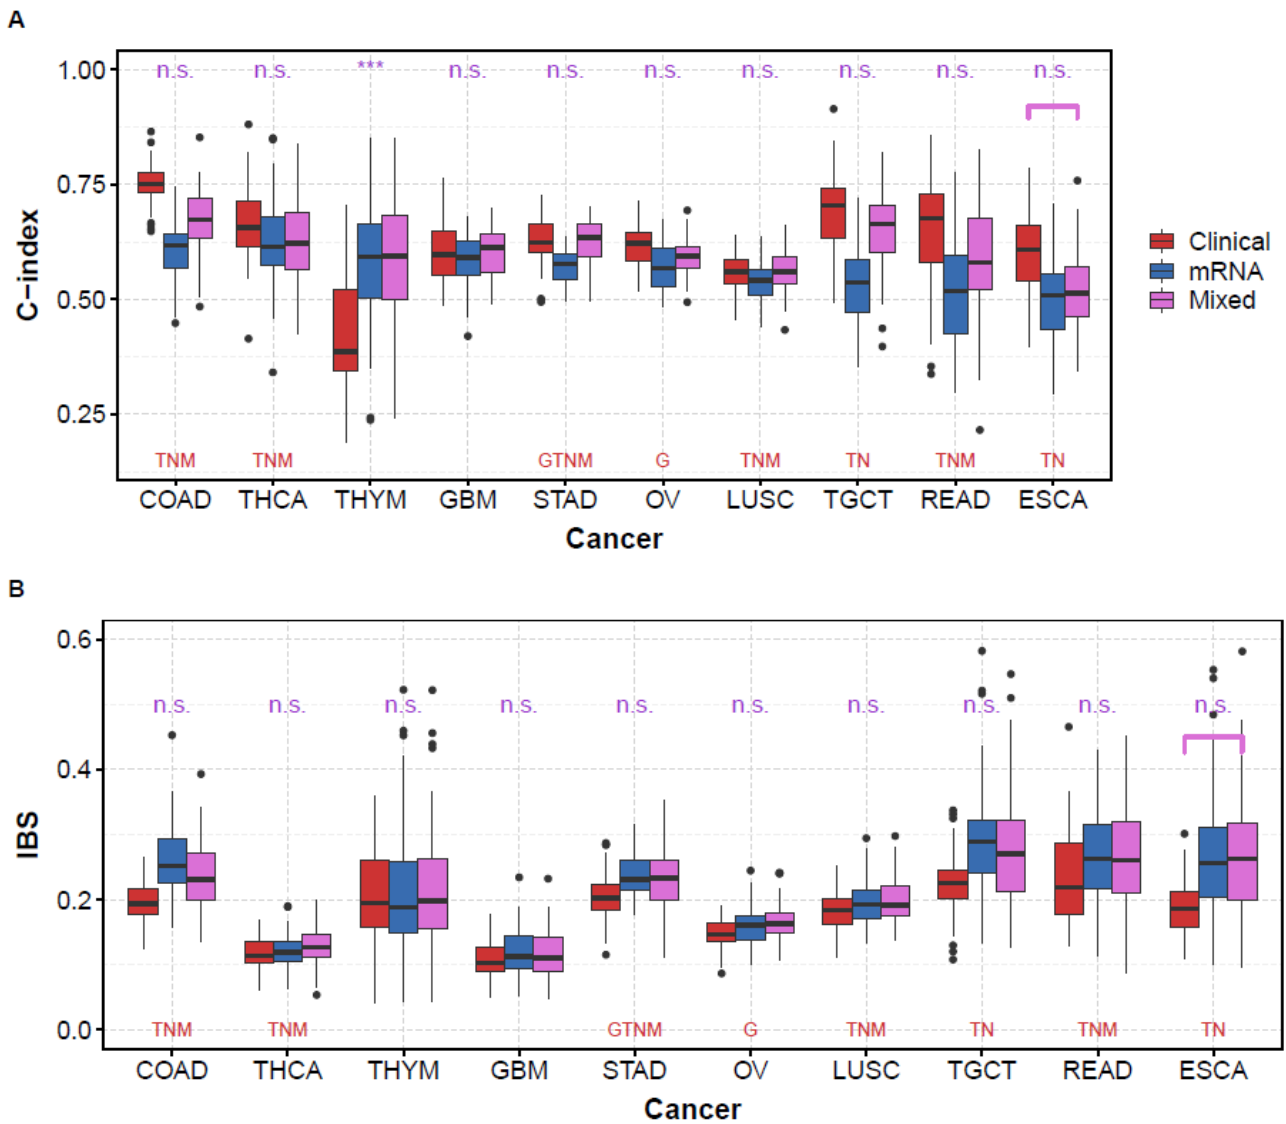

**Supplementary Fig. S5. C-indices (A) and IBS (B) obtained with clinical data alone (red), mRNA-seq data alone (blue), and clinical and mRNA-seq data together (purple) for the 10 cancers not studied in terms of pre-screening.**

Procedure detailed in Figure 1. We computed the metrics by 10 repetitions of a K-fold cross-validation (K=5). To evaluate whether the added value of mRNA-seq data for prediction is significant over clinical data alone, we computed the p-values of a one-sided Wilcoxon signed-rank test between clinical and both clinical+mRNA-seq (red versus pink boxplots, pink stars at the top of each graphic, Benjamini-Hochberg correction for the 26 p-values).

Red letters at the bottom of each graphics indicate the clinical data available (G: grade; T: tumor; N: node; M: metastasis). Age is available for all cancers, and gender only for non-unisexual cancers (CESC, PRAD, TGCT are sex-specific).

\*\*\*:  $p \leq 0.001$ , \*\*:  $p \leq 0.01$ , \*:  $p \leq 0.05$ , +:  $p \leq 0.1$ , n.s. :  $p > 0.1$

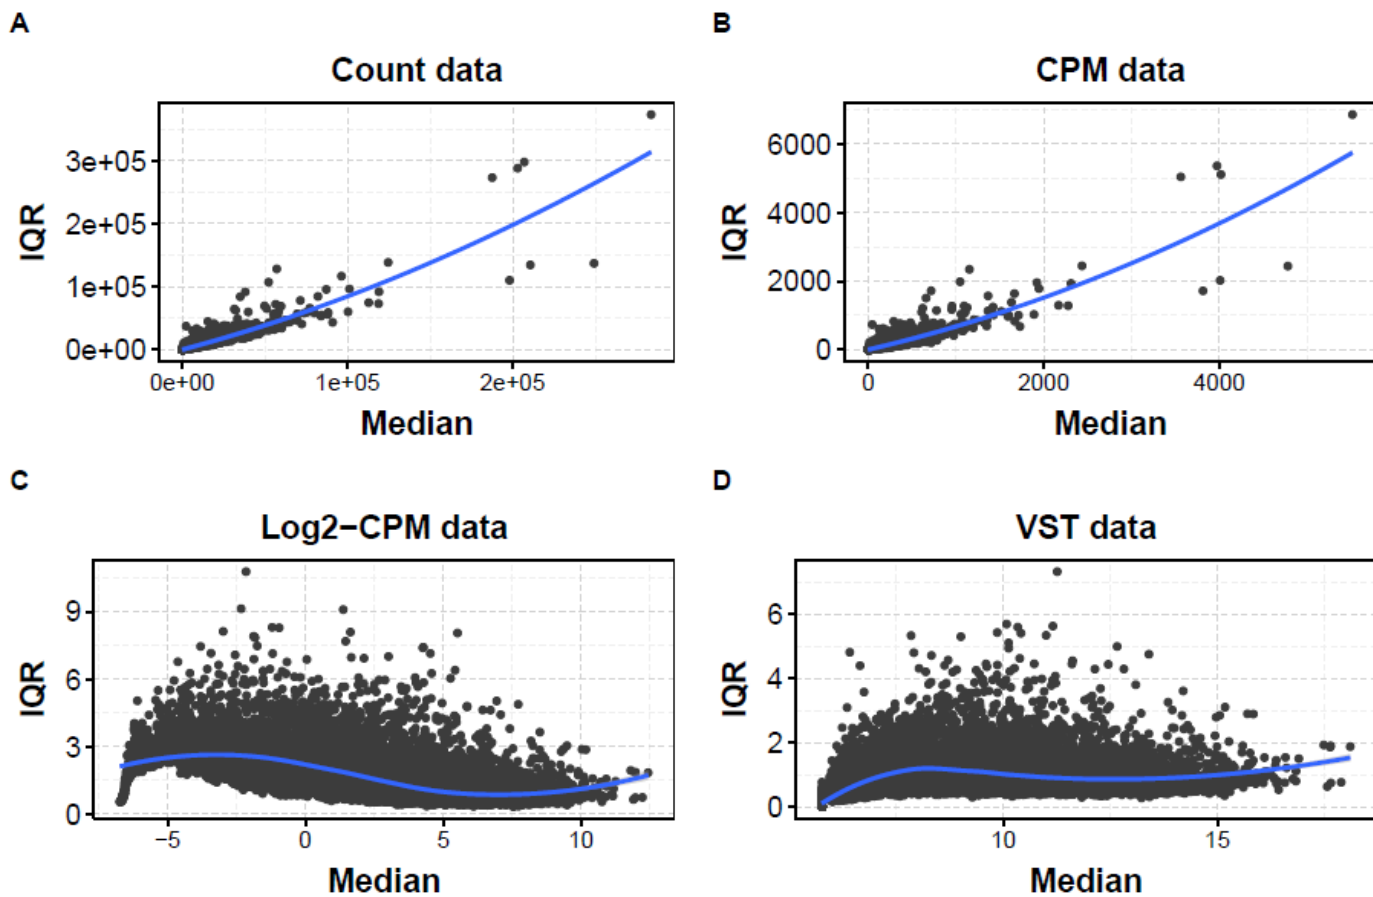

**Supplementary Fig. S6. Median-IQR trend of gene expression for raw count data (A), CPM data (B), log2-CPM data (C), and VST data (D) for BRCA.**

The blue curve is the loess estimate on each point (gene).

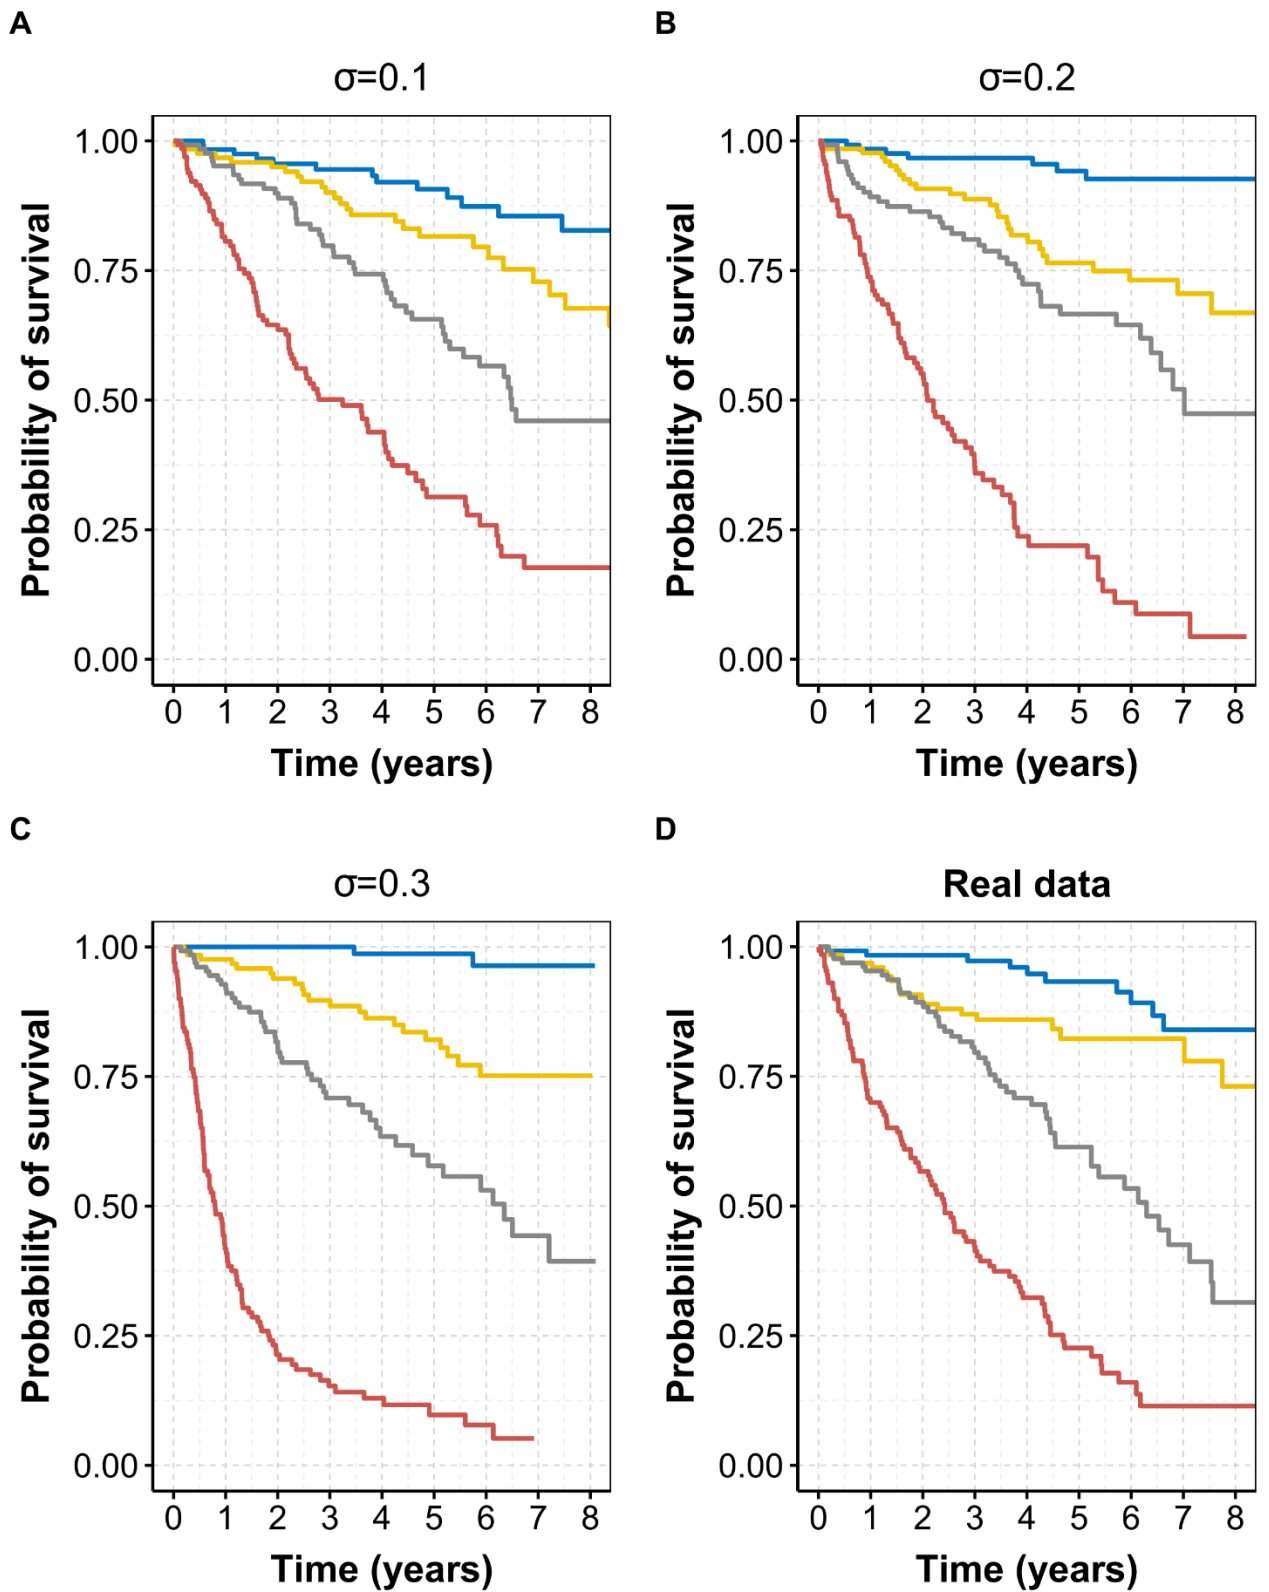

**Supplementary Fig. S7. Kaplan-Meier curves of three simulations (A-C) with varying  $\sigma$  compared with the real TCGA dataset KIRC (D).**

Simulated (A-C) or real (D) datasets are separated in 4 equal groups depending on prognostic indices (PI).  $\sigma$  corresponds to the standard used to simulate the  $\beta$  values in a centered normal law.

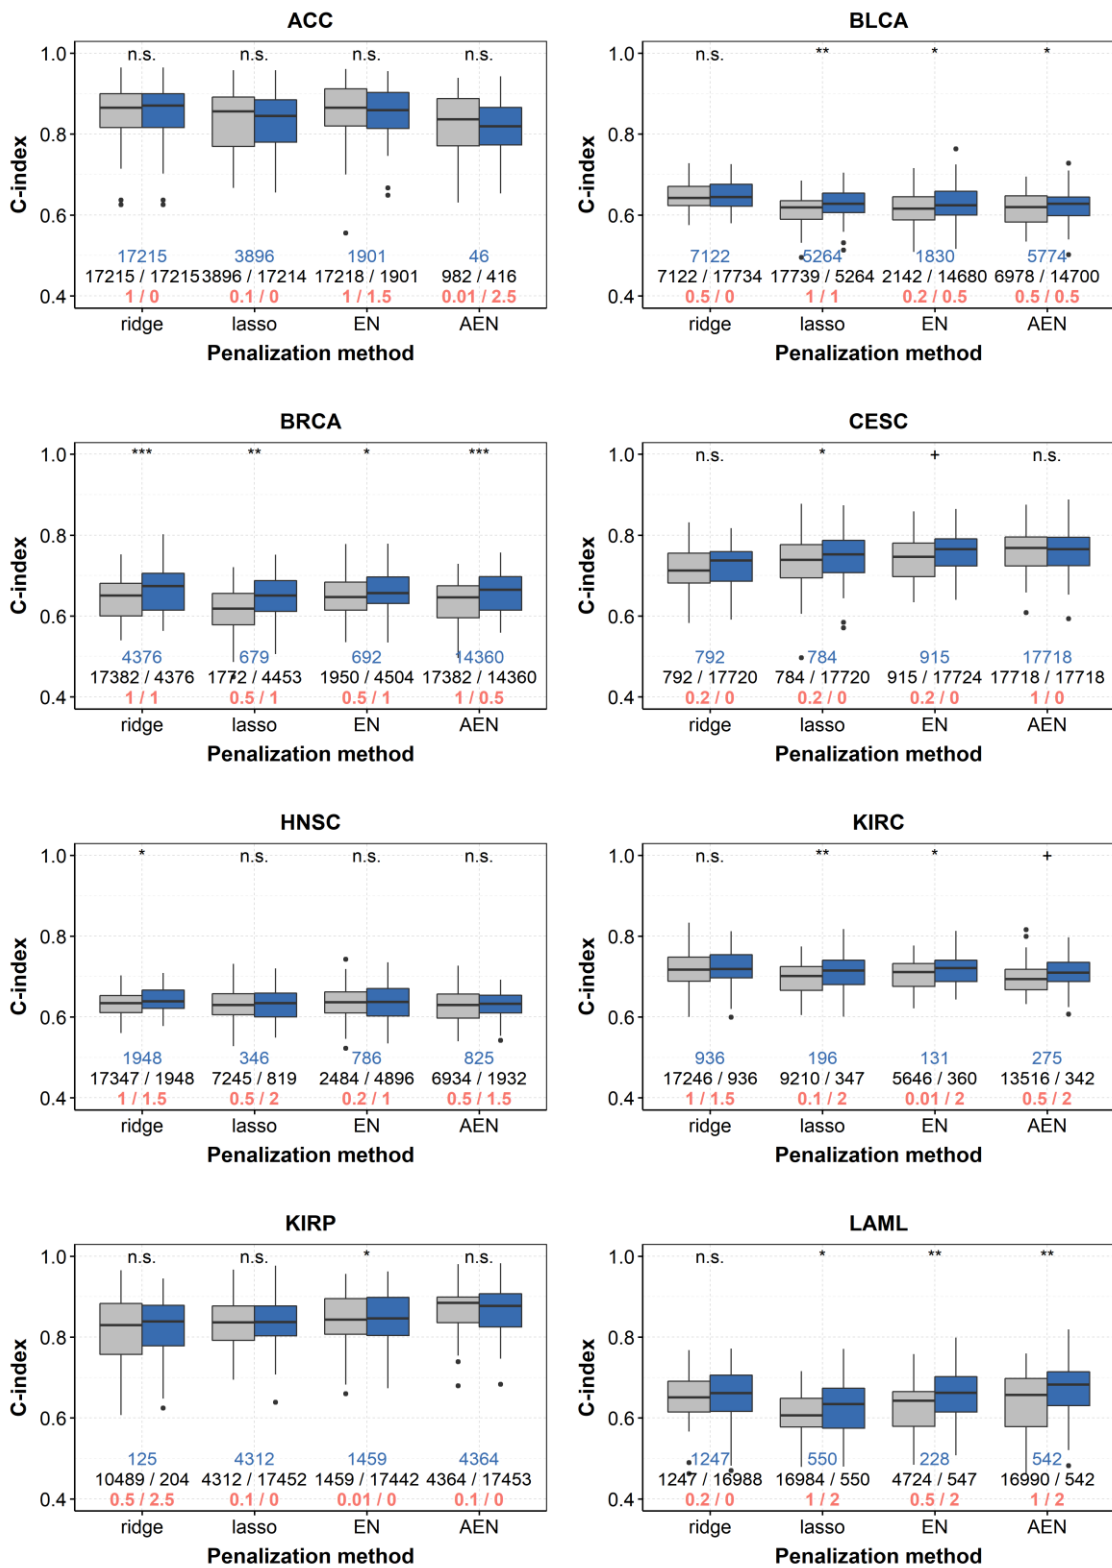

**Supplementary Fig. S8. C-indices without pre-screening (gray boxplots) and with pre-screening in the optimal threshold (blue boxplots) for various Cox model penalizations applied to 8 cancers. Equivalent of Figure 2C.**

Procedure detailed in Figure 1. Blue numbers are the number of genes retained after both thresholds of the prescreening step; black and red numbers are respectively the number of genes and the optimal thresholds retained by supervised (left) and unsupervised (right) pre-screening.

\*\*\*:  $p \leq 0.001$ , \*\*:  $p \leq 0.01$ , \*:  $p \leq 0.05$ , +:  $p \leq 0.1$ , n.s. :  $p > 0.1$

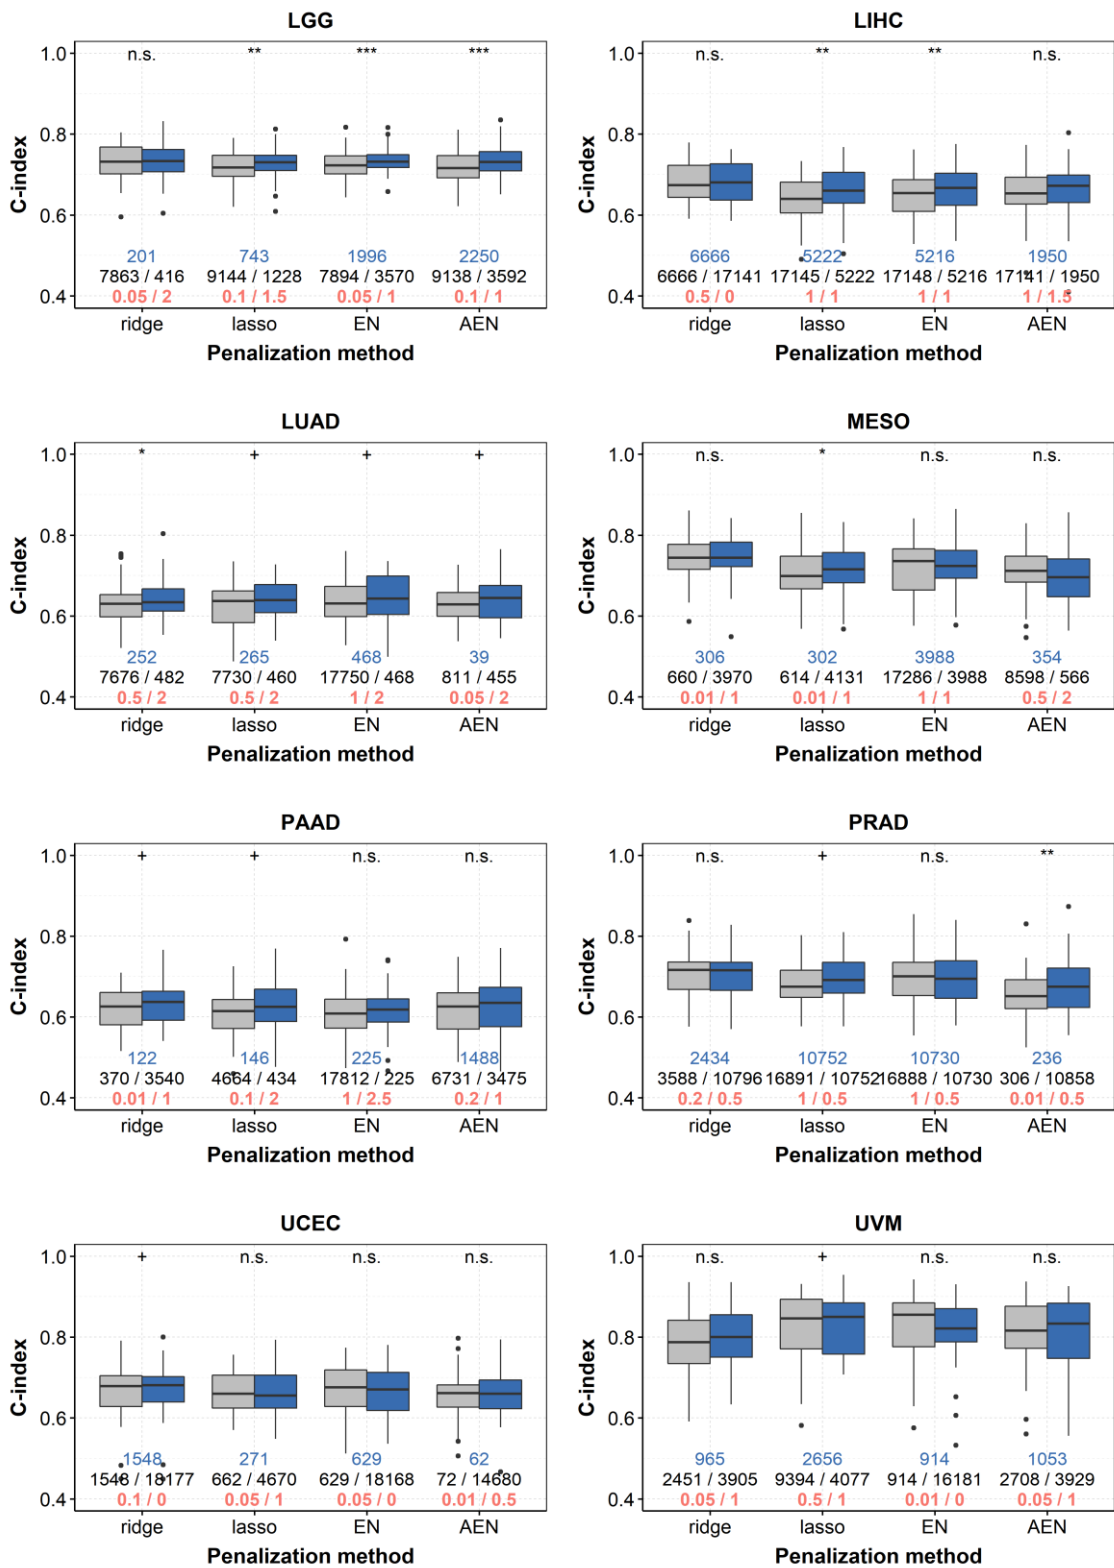

**Supplementary Fig. S9. C-indices without pre-screening (gray boxplots) and with pre-screening in the optimal threshold (blue boxplots) for various Cox model penalizations applied to 8 other cancers. Equivalent of Figure 2C.**

Procedure detailed in Figure 1. Blue numbers are the number of genes retained after both thresholds of the prescreening step; black and red numbers are respectively the number of genes and the optimal thresholds retained by supervised (left) and unsupervised (right) pre-screening.

\*\*\*:  $p \leq 0.001$ , \*\*:  $p \leq 0.01$ , \*:  $p \leq 0.05$ , +:  $p \leq 0.1$ , n.s. :  $p > 0.1$

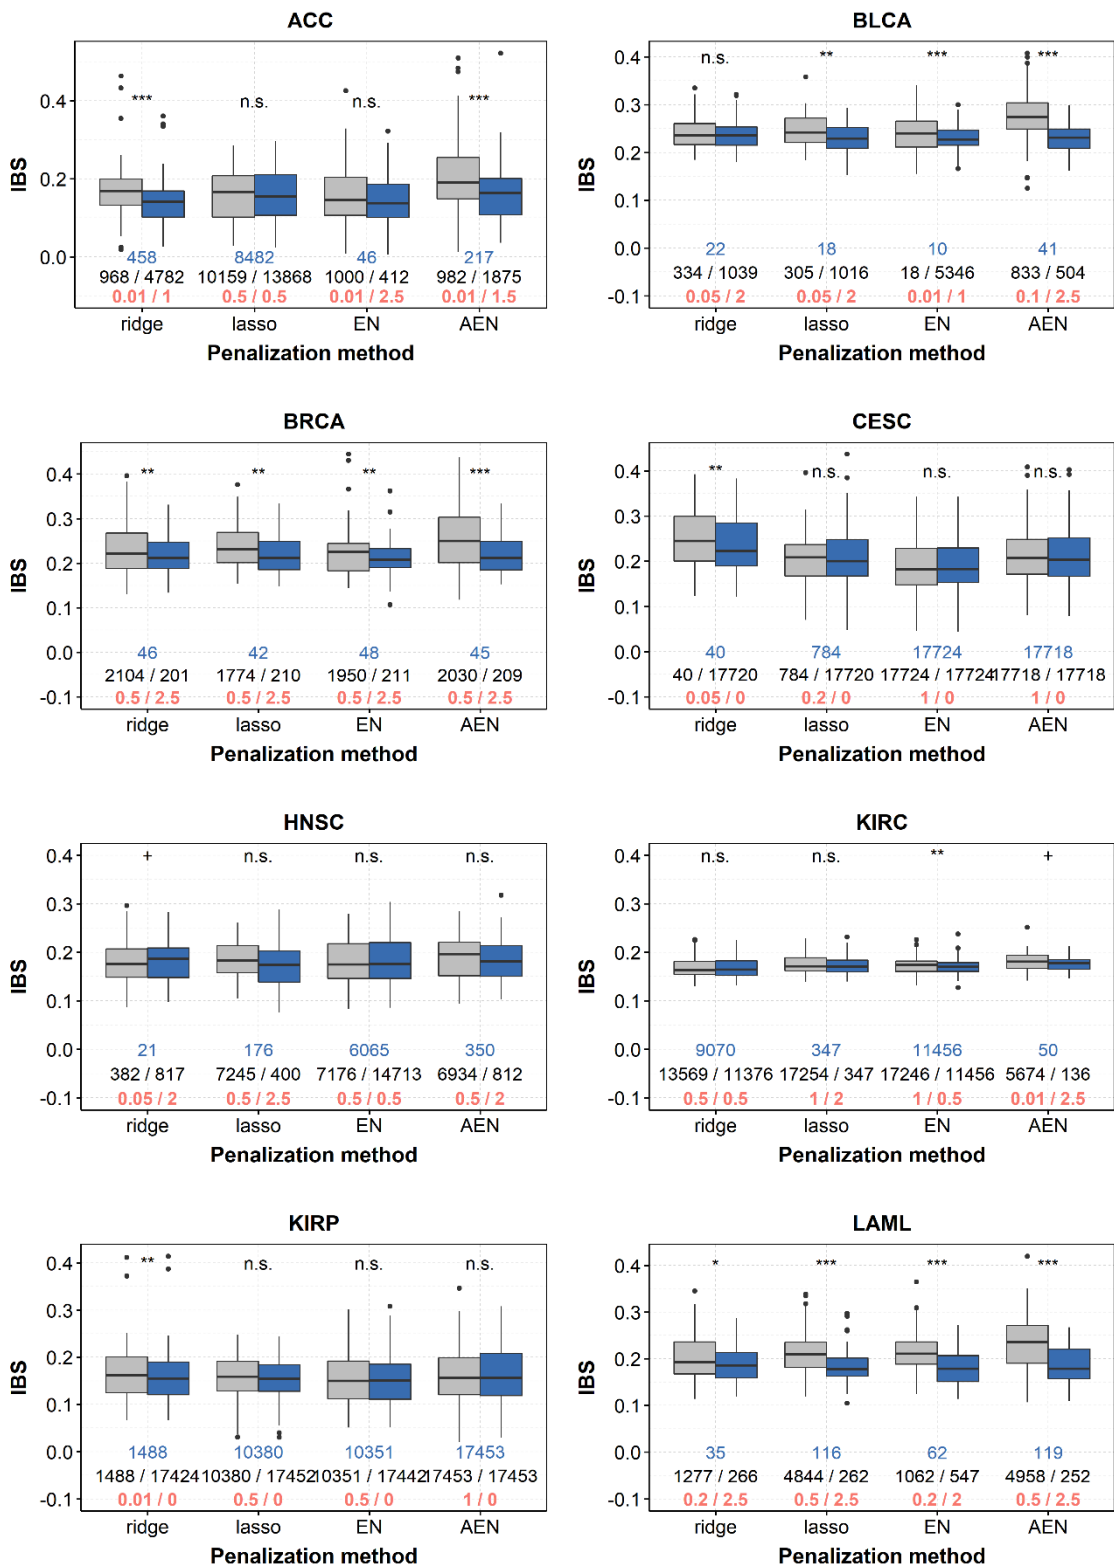

**Supplementary Fig. S10. IBS without pre-screening (gray boxplots) and with pre-screening in the optimal threshold (blue boxplots) for various Cox model penalizations applied to 8 cancers. Equivalent of Figure 2C.**

Procedure detailed in Figure 1. Blue numbers are the number of genes retained after both thresholds of the prescreening step; black and red numbers are respectively the number of genes and the optimal thresholds retained by supervised (left) and unsupervised (right) pre-screening.

\*\*\*:  $p \leq 0.001$ , \*\*:  $p \leq 0.01$ , \*:  $p \leq 0.05$ , +:  $p \leq 0.1$ , n.s. :  $p > 0.1$

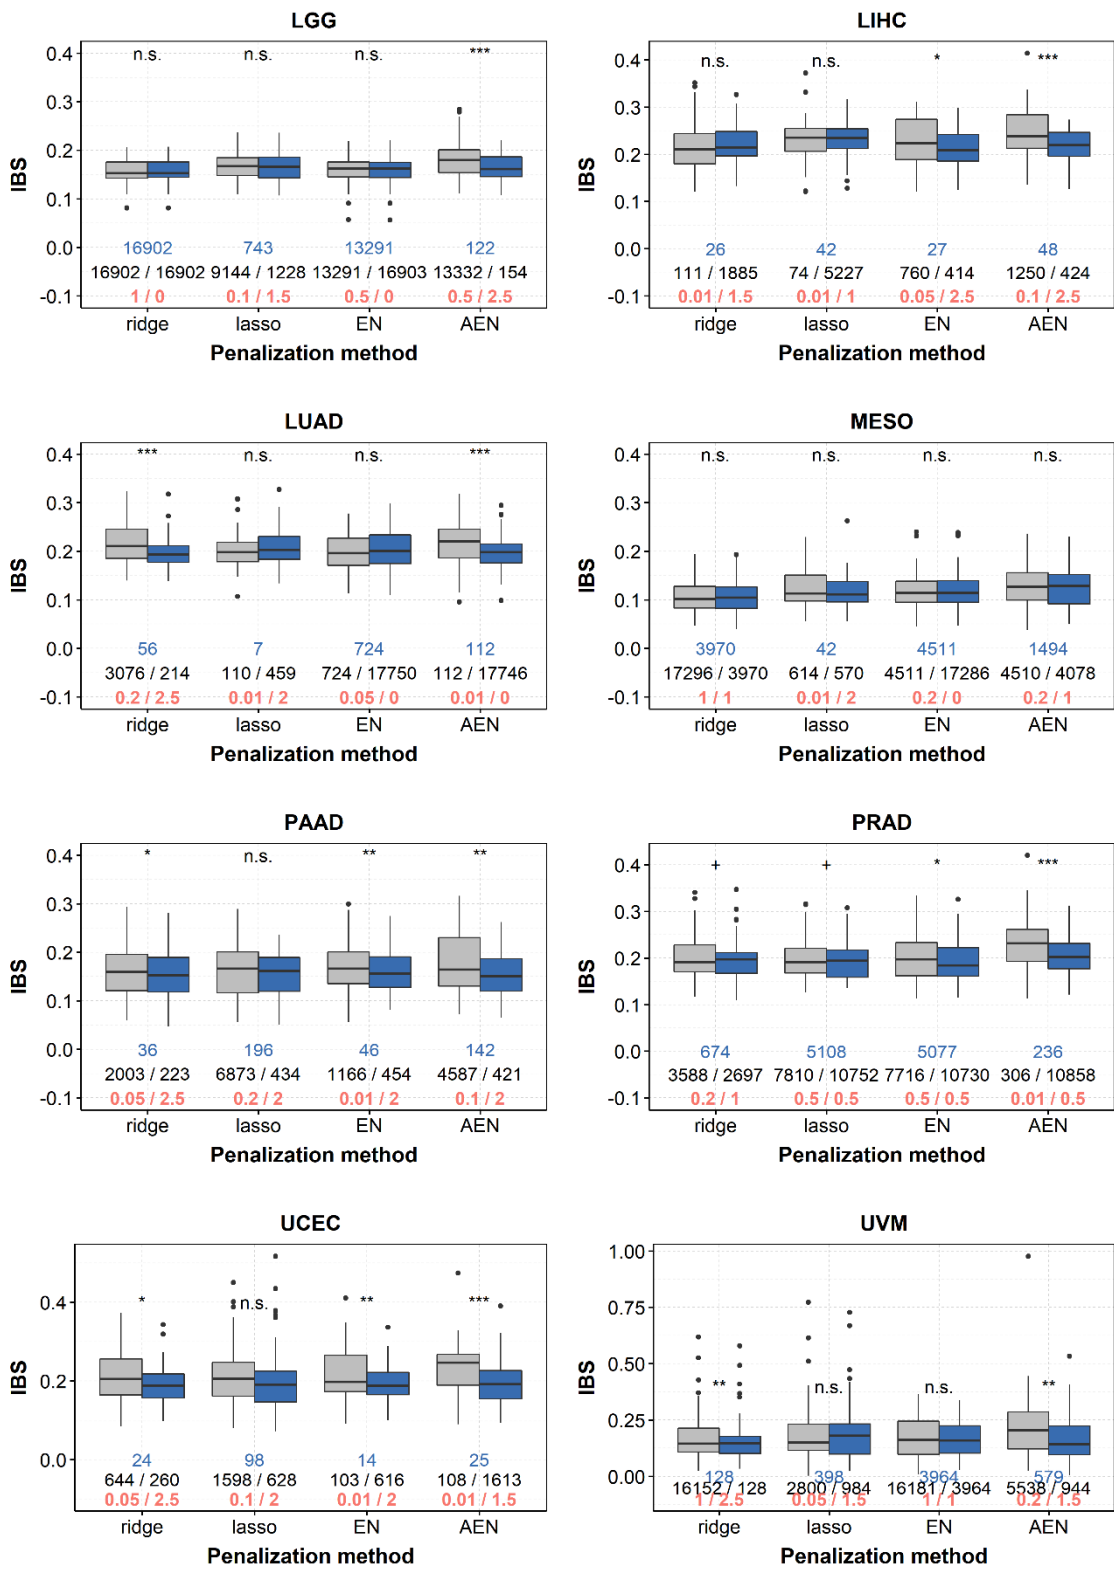

**Supplementary Fig. S11. IBS without pre-screening (gray boxplots) and with pre-screening in the optimal threshold (blue boxplots) for various Cox model penalizations applied to 8 other cancers. Equivalent of Figure 2C.**

Procedure detailed in Figure 1. Blue numbers are the number of genes retained after both thresholds of the prescreening step; black and red numbers are respectively the number of genes and the optimal thresholds retained by supervised (left) and unsupervised (right) pre-screening.

\*\*\*:  $p \leq 0.001$ , \*\*:  $p \leq 0.01$ , \*:  $p \leq 0.05$ , +:  $p \leq 0.1$ , n.s. :  $p > 0.1$

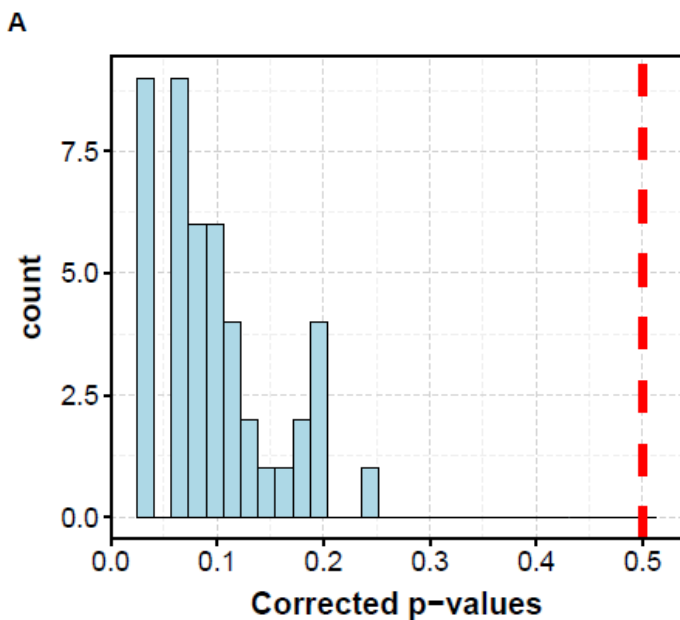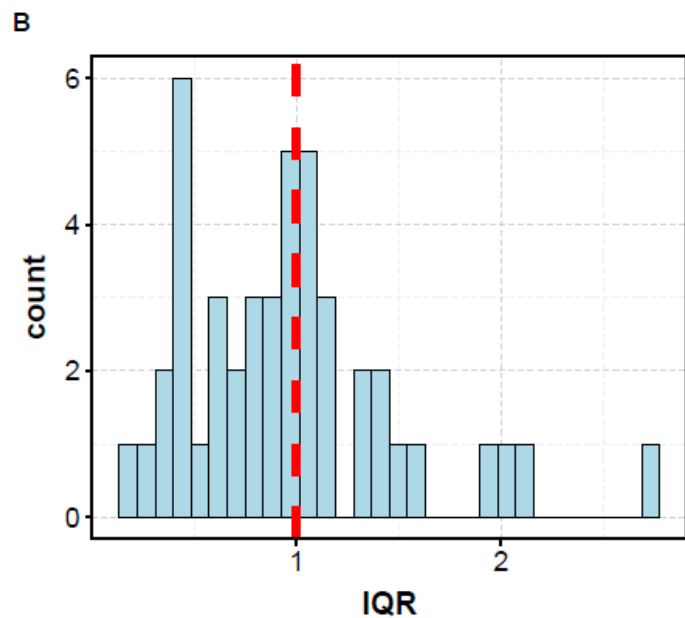

**Supplementary Fig. S12. P-values of univariate Cox models corrected with the Benjamini-Hochberg procedure (A) and IQR of the VST data (B) of the genes selected by elastic net for BRCA (without pre-screening).**

The red dashed vertical lines are the optimal thresholds for each case.

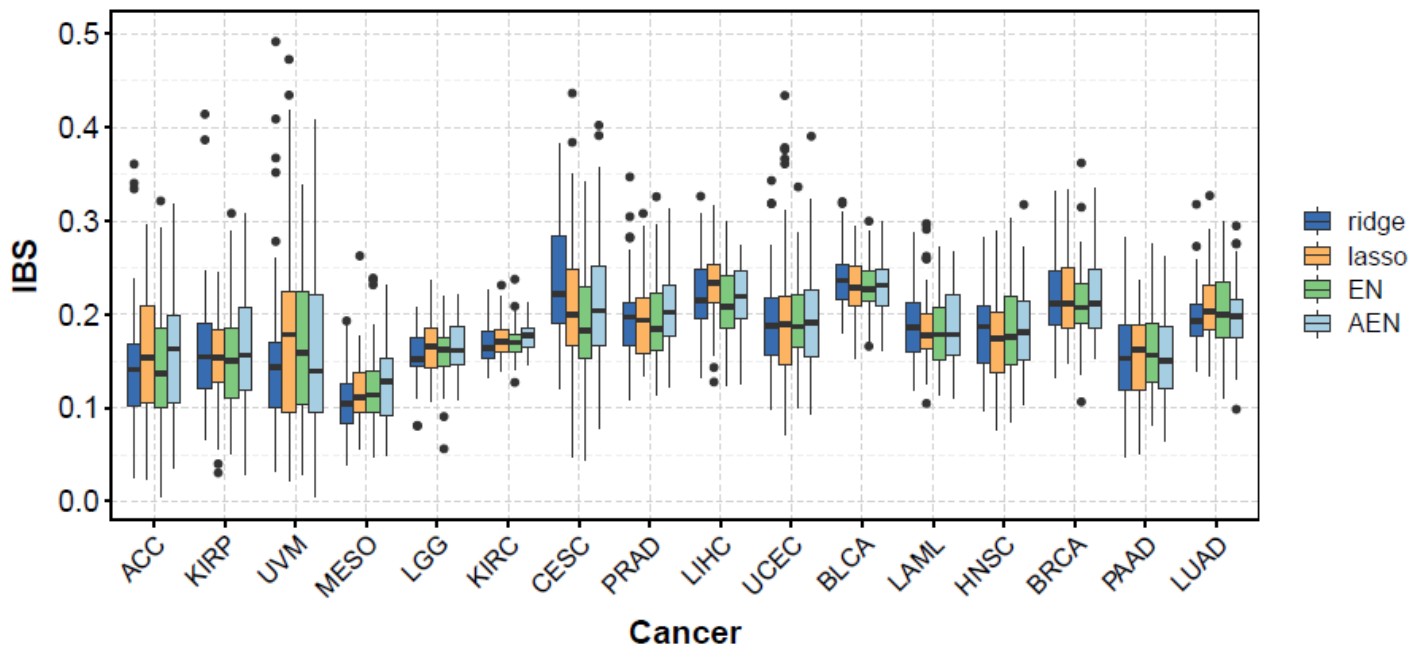

**Supplementary Fig. S13. IBS obtained after pre-screening for the 16 cancers and the penalization methods studied (i.e. ridge, lasso, elastic net, adaptive elastic net).**

Procedure detailed in Figure 1, that is in each case, we computed the IBS by 10 repetitions of a nested 5-fold cross validation.

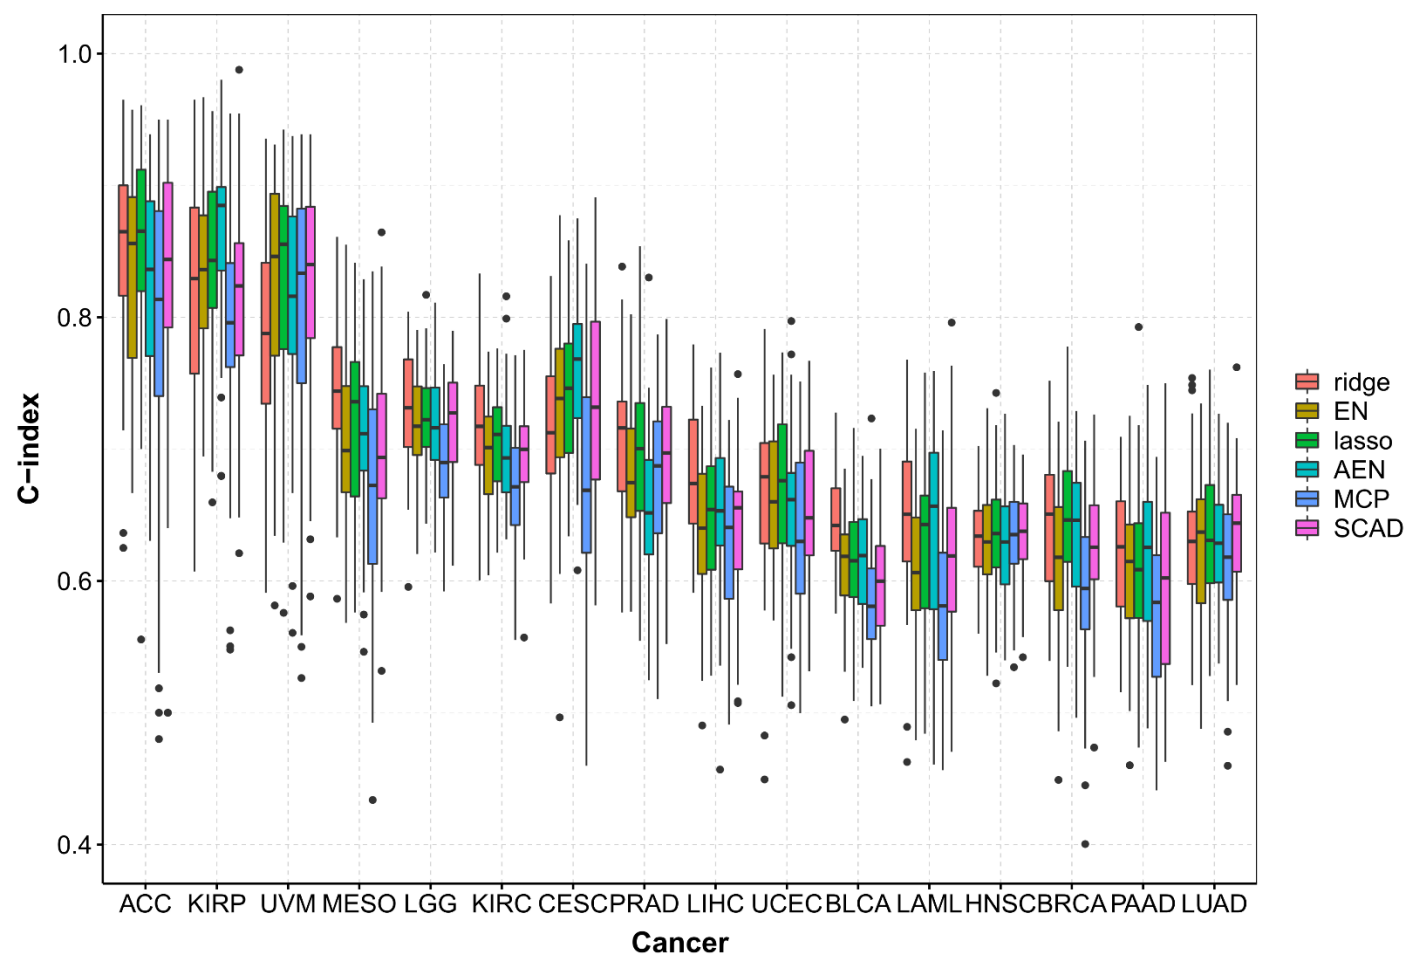

**Supplementary Fig. S14. C-index obtained after pre-screening for the 16 cancers and the penalization methods studied (i.e. ridge, lasso, elastic net, adaptive elastic net) together with SCAD and MCP.**

Procedure detailed in Figure 1, that is in each case, we computed the C-index by 10 repetitions of a nested 5-fold cross validation.

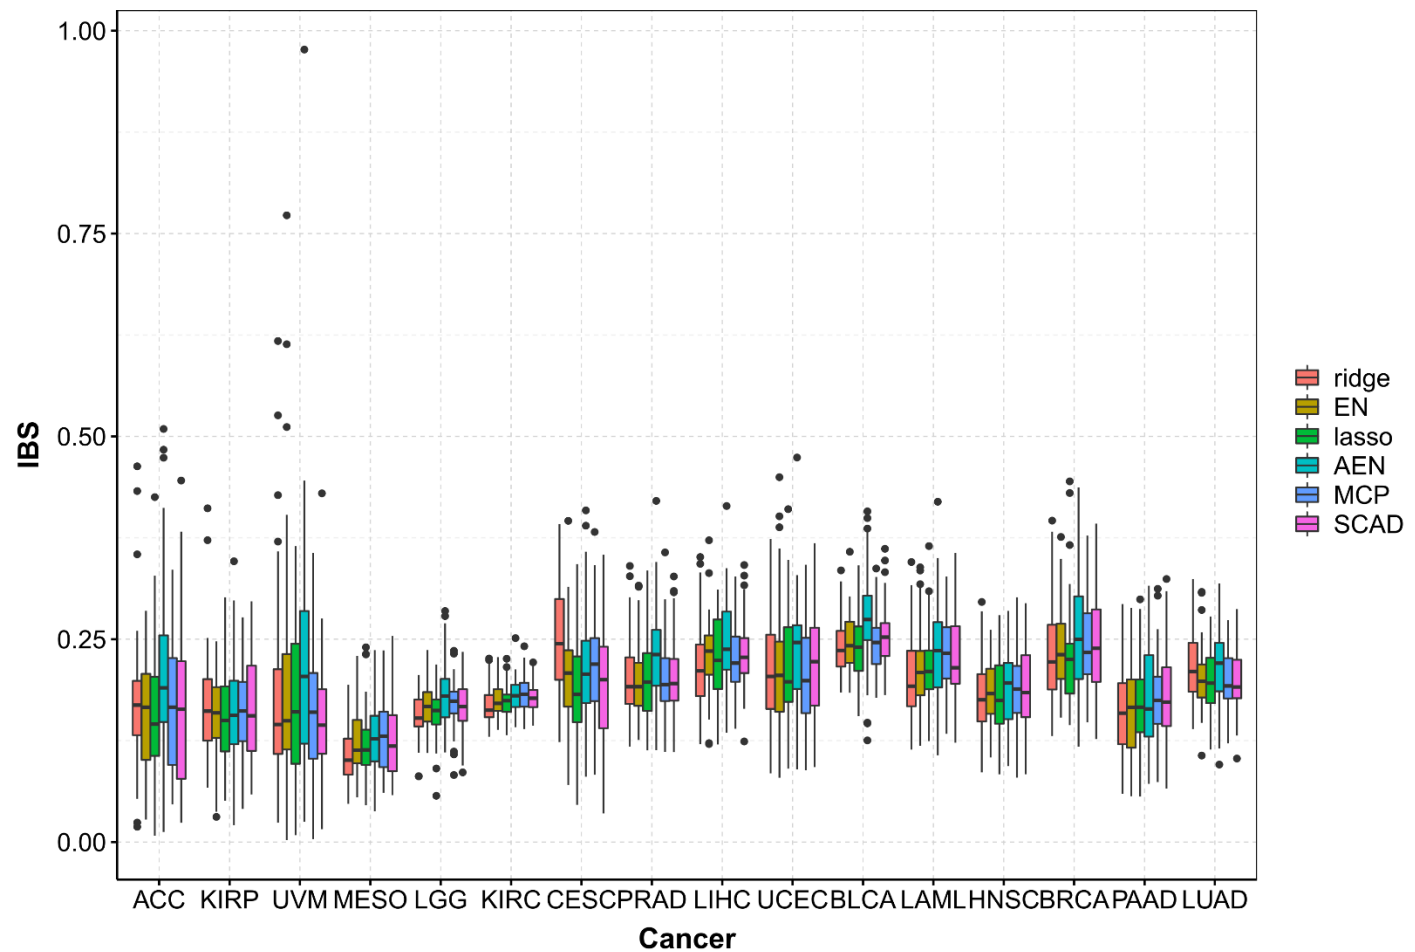

**Supplementary Fig. S15. IBS obtained after pre-screening for the 16 cancers and the penalization methods studied (i.e. ridge, lasso, elastic net, adaptive elastic net) together with SCAD and MCP.**

Procedure detailed in Figure 1, that is in each case, we computed the IBS by 10 repetitions of a nested 5-fold cross validation.

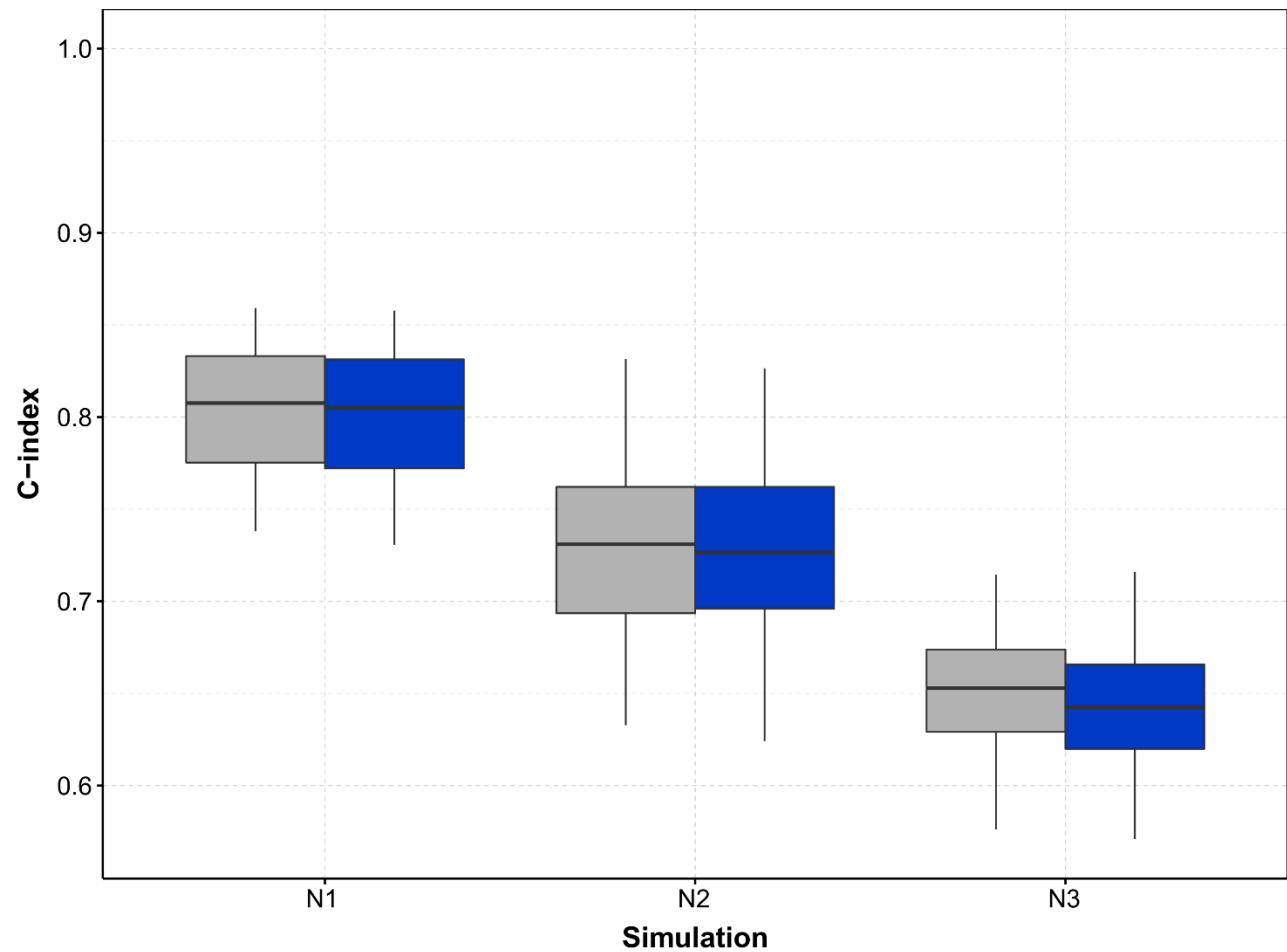

**Supplementary Fig. S16. C-indices without pre-screening (gray boxplots) and with pre-screening in the optimal threshold (blue boxplots) for 3 simulated datasets. Equivalent of Figure 2C.**

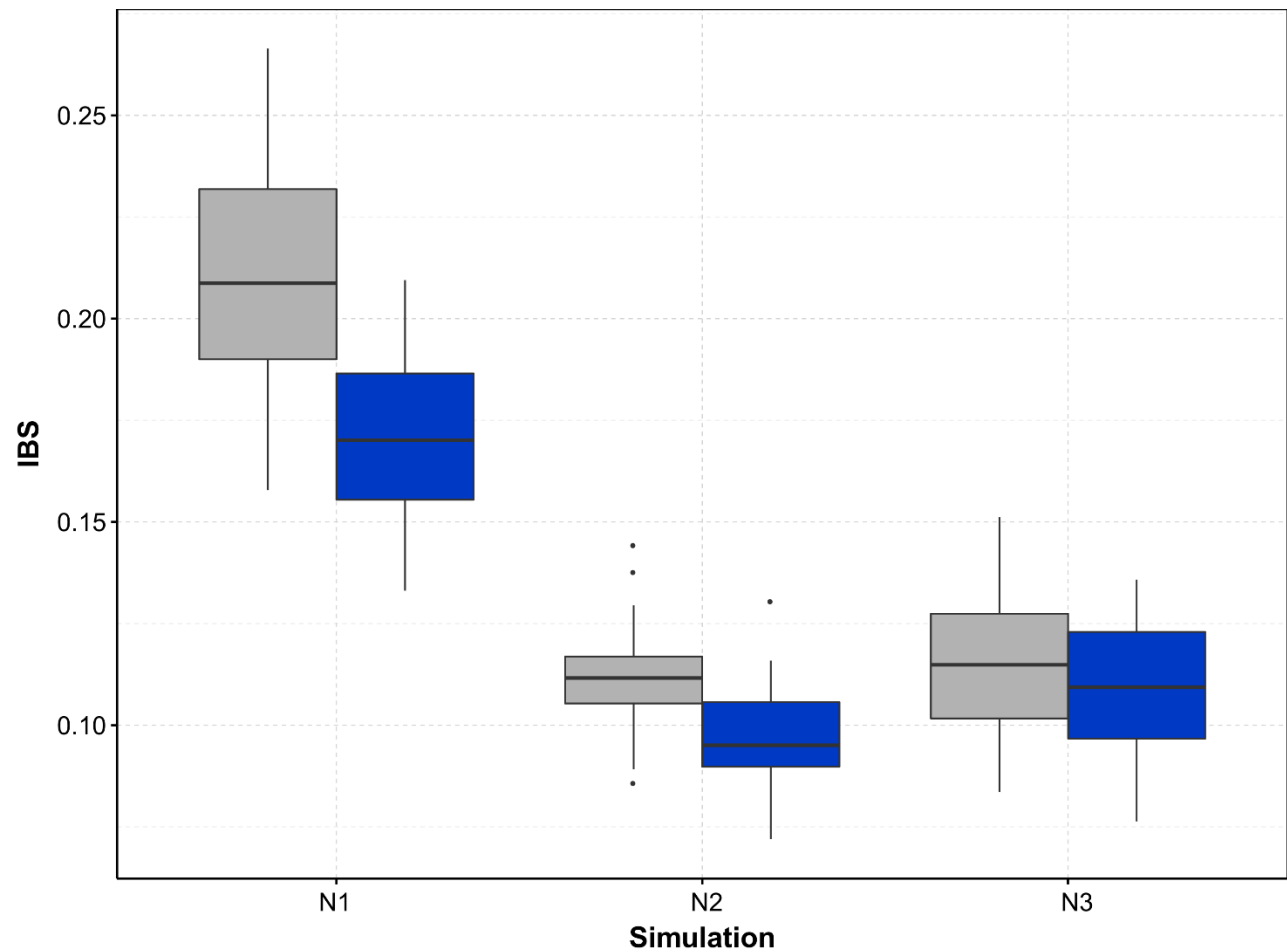

**Supplementary Fig. S17. IBS without pre-screening (gray boxplots) and with pre-screening in the optimal threshold (blue boxplots) for 3 simulated datasets.**

A

| Cancer        | ACC   | KIRP  | UVM   | MESO  | LGG   | KIRC  | CESC  | PRAD  |
|---------------|-------|-------|-------|-------|-------|-------|-------|-------|
| Correlation   | 0.993 | 0.995 | 0.994 | 0.996 | 0.998 | 0.995 | 0.998 | 0.996 |
| Signif. Level | ***   | ***   | ***   | ***   | ***   | ***   | ***   | ***   |
| Cancer        | LIHC  | UCEC  | BLCA  | LAML  | HNSC  | BRCA  | PAAD  | LUAD  |
| Correlation   | 0.998 | 0.998 | 0.999 | 0.998 | 0.999 | 0.999 | 0.997 | 0.999 |
| Signif. Level | ***   | ***   | ***   | ***   | ***   | ***   | ***   | ***   |

B

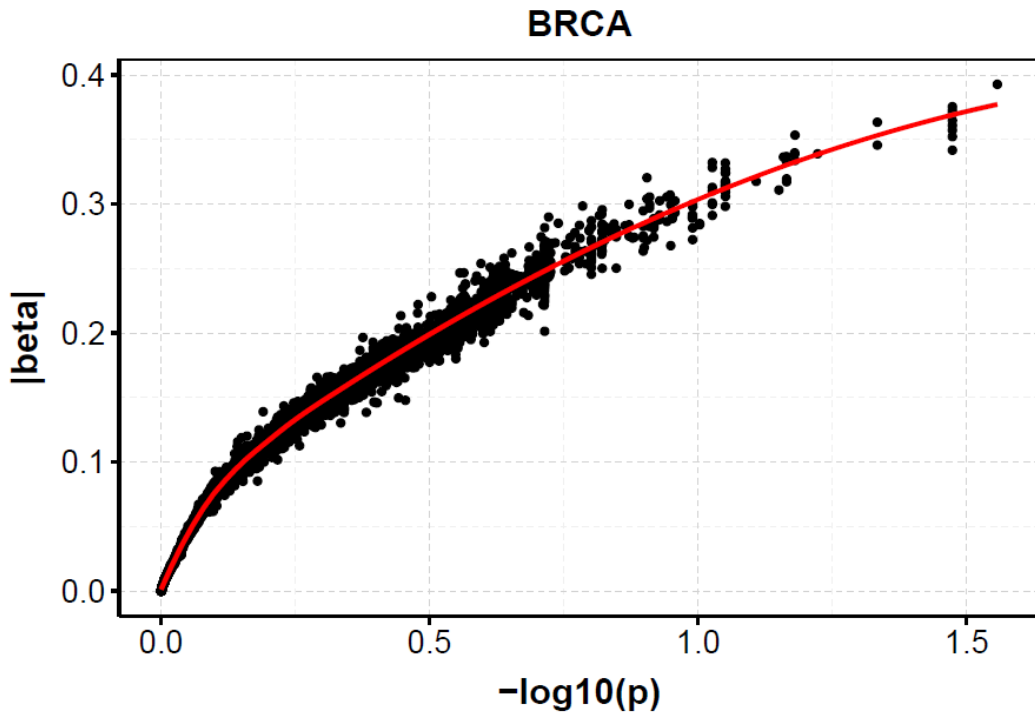

**Supplementary Fig. S18. Spearman correlations between  $|\text{beta}|$  coefficients and p-values of univariate Cox models for each gene and significance level (A), and p-values as a function of  $|\text{beta}|$  for BRCA (B).**

In graphics B, each dot represent a gene, and the red curve is loess regression over all points.

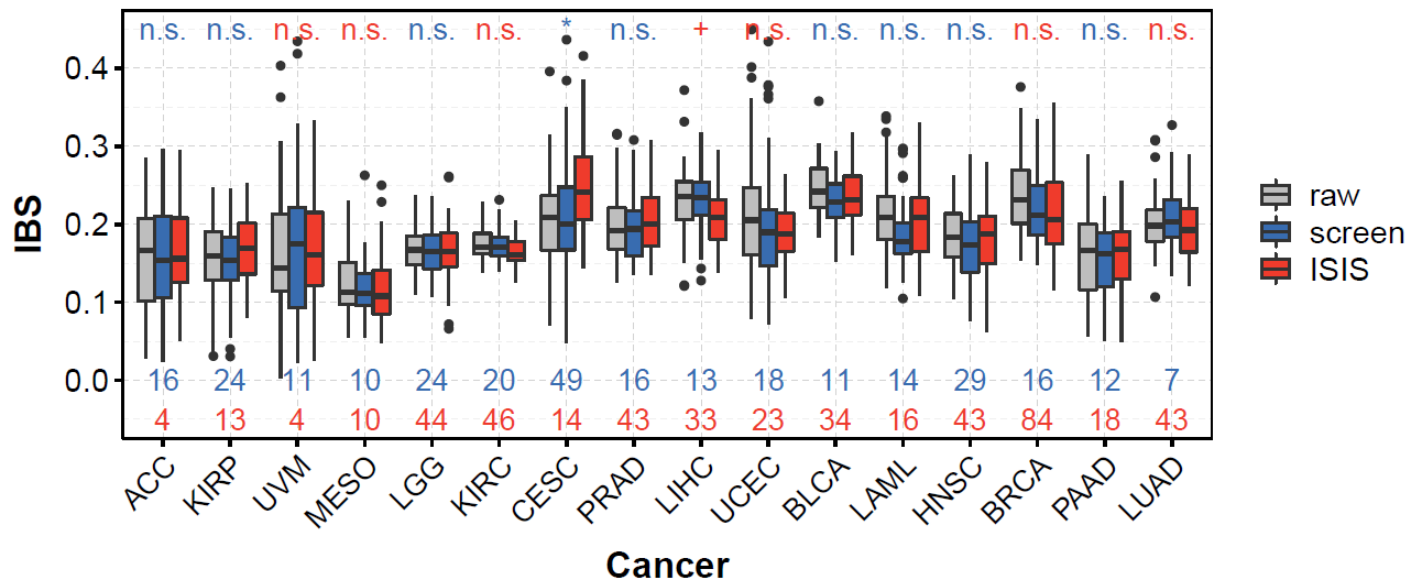

**Supplementary Fig. S19. IBS obtained with the lasso without pre-screening (gray), with the lasso after the bi-dimensional pre-screening (blue), and with Independent Sure Independent Screening (ISIS, red).**

Procedure detailed in Figure 1, that is we computed the IBS by 10 repetitions of a K-fold cross-validation (K=5). To test whether the median IBS obtained with ISIS and the bi-dimensional pre-screening are different, we computed p-values of a Wilcoxon test between screen and ISIS conditions (blue versus red boxplots, stars above the graphics). The 16 p-values are corrected with Benjamini-Hochberg method.

Red star: the median IBS is lower for ISIS.

Blue star: the median IBS is lower for the bi-dimensional pre-screening.

Blue numbers: number of genes selected by the lasso.

Red numbers: number of genes retained by ISIS.

\*\*\*:  $p \leq 0.001$ , \*\*:  $p \leq 0.01$ , \*:  $p \leq 0.05$ , +:  $p \leq 0.1$ , n.s. :  $p > 0.1$

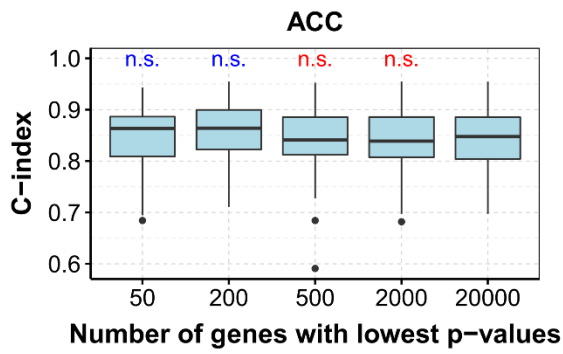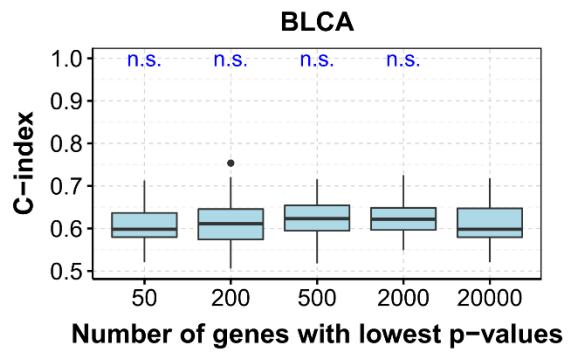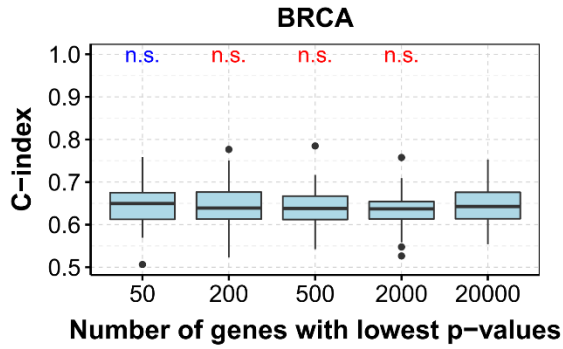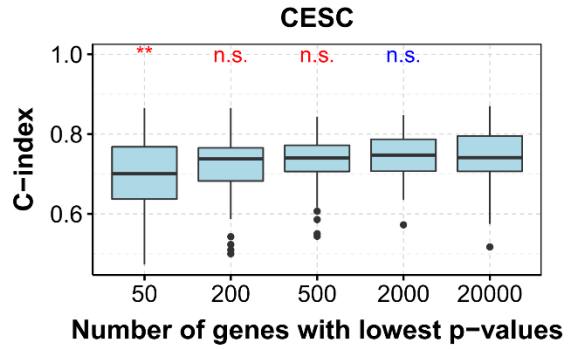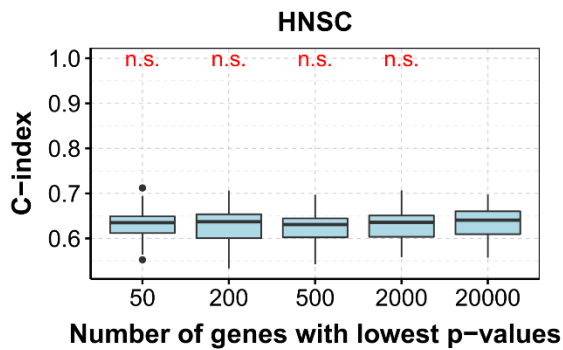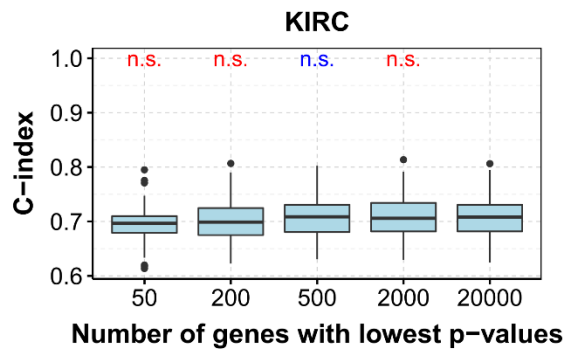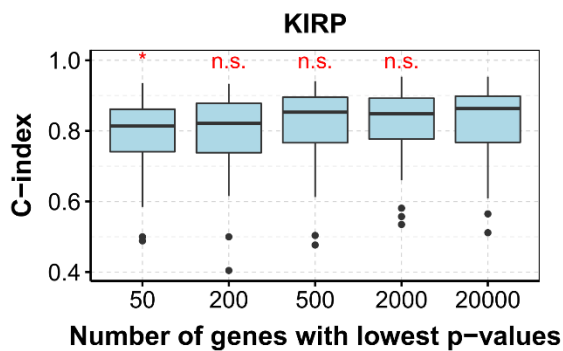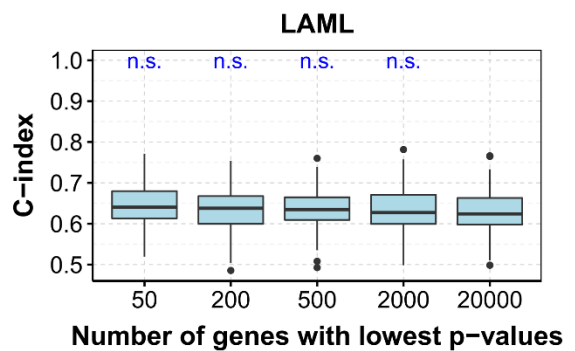

**Supplementary Fig. S20. C-indices as a function of the number of genes with lowest univariate Cox model p-value used in the elastic net model.**

Procedure detailed in Figure 1. Bilateral test. Blue (resp. red) indications correspond to improved (degraded) median performance.

\*\*\*:  $p \leq 0.001$ , \*\*:  $p \leq 0.01$ , \*:  $p \leq 0.05$ , +:  $p \leq 0.1$ , n.s. :  $p > 0.1$

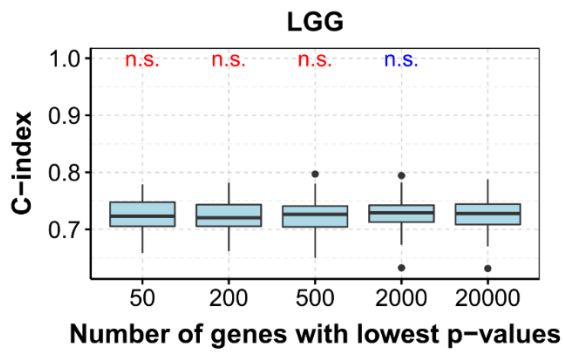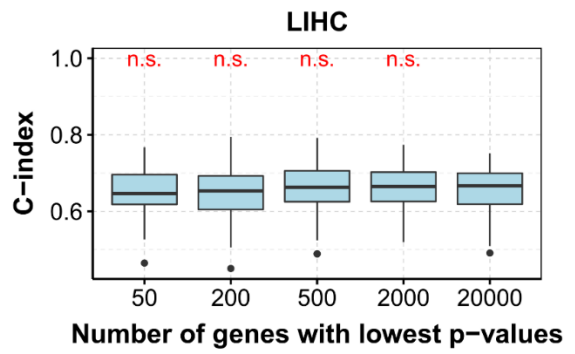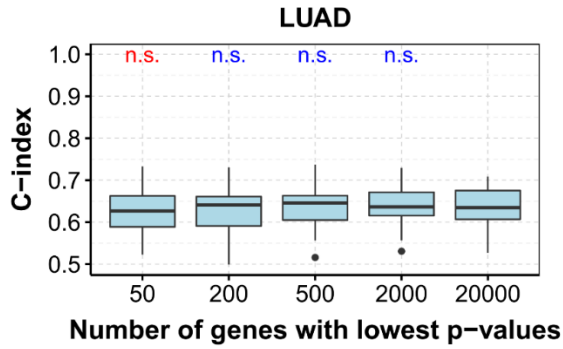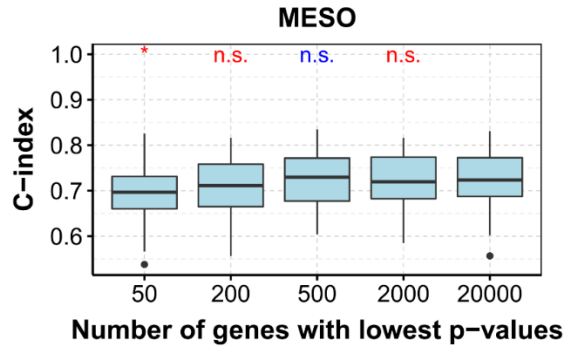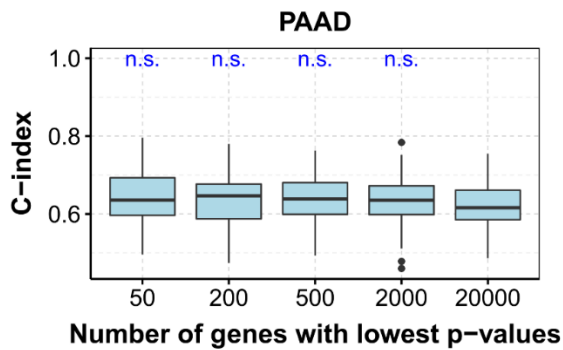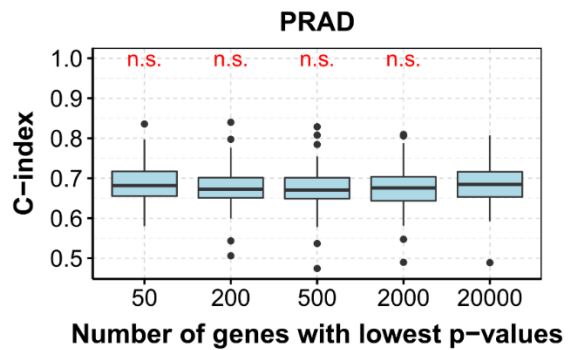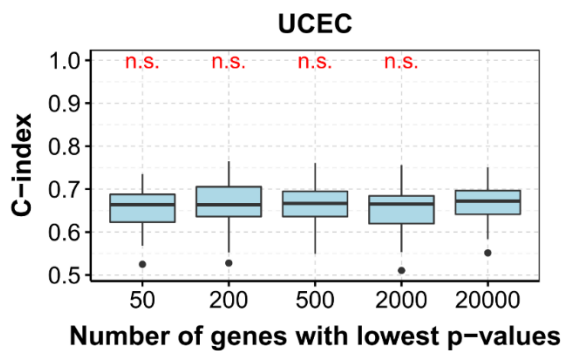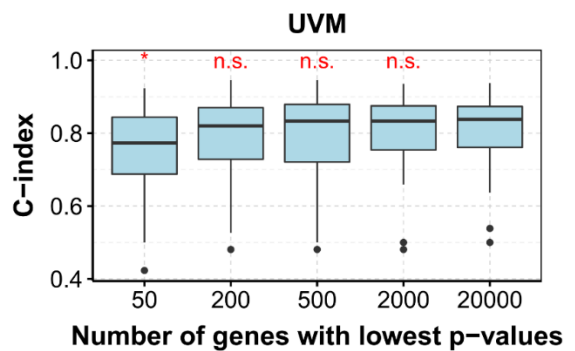

**Supplementary Fig. S21. C-indices as a function of the number of genes with lowest univariate Cox model p-value used in the elastic net model.**

Procedure detailed in Figure 1. Bilateral test. Blue (resp. red) indications correspond to improved (degraded) median performance.

\*\*\*:  $p \leq 0.001$ , \*\*:  $p \leq 0.01$ , \*:  $p \leq 0.05$ , +:  $p \leq 0.1$ , n.s. :  $p > 0.1$

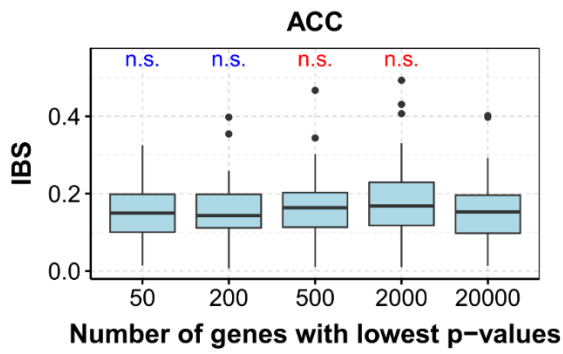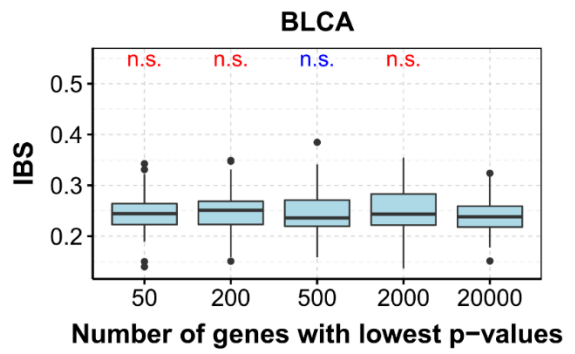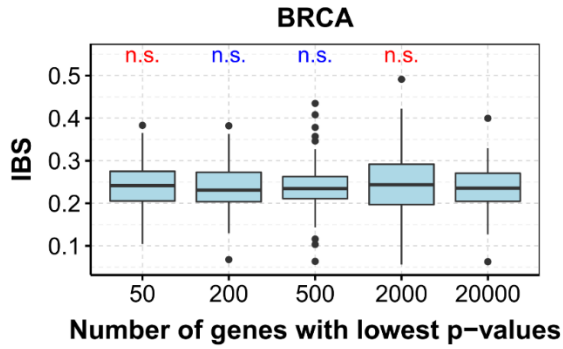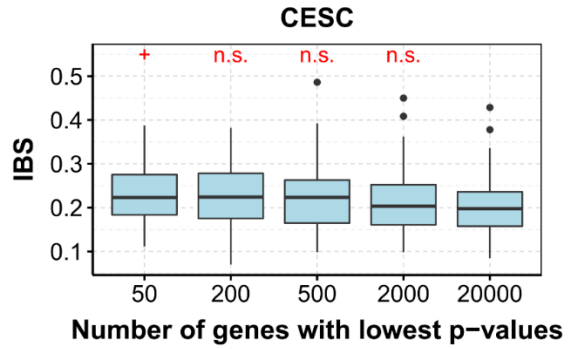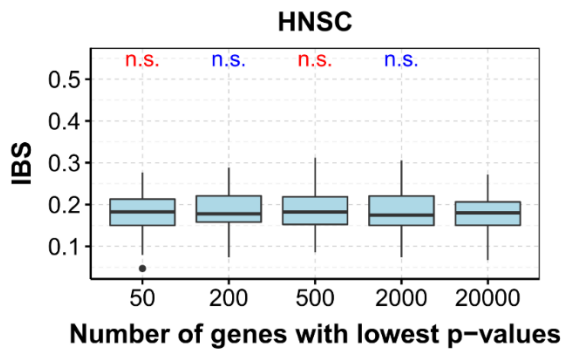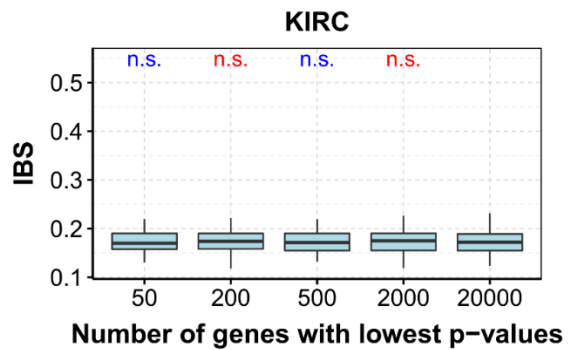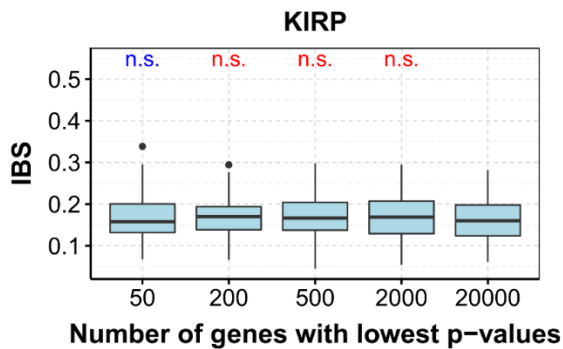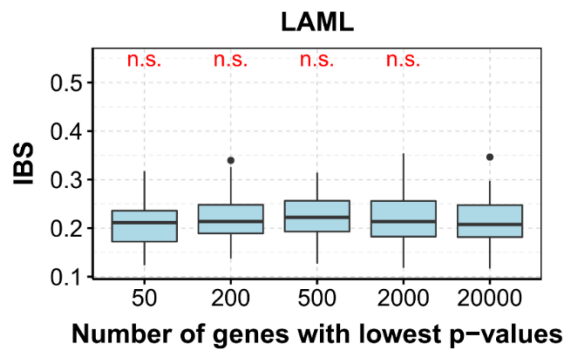

**Supplementary Fig. S22. IBS as a function of the number of genes with lowest univariate Cox model p-value used in the elastic net model.**

Procedure detailed in Figure 1. Bilateral test. Blue (resp. red) indications correspond to improved (degraded) median performance.

\*\*\*:  $p \leq 0.001$ , \*\*:  $p \leq 0.01$ , \*:  $p \leq 0.05$ , +:  $p \leq 0.1$ , n.s. :  $p > 0.1$

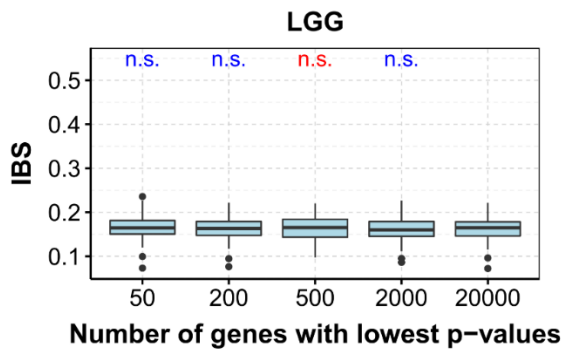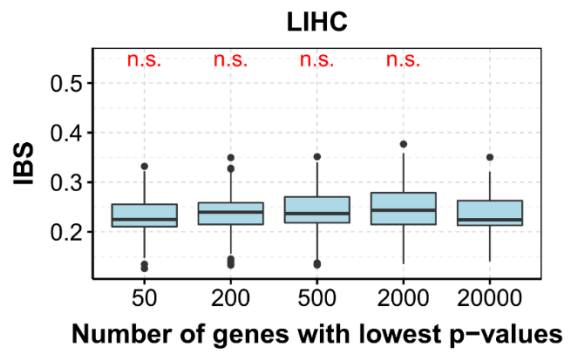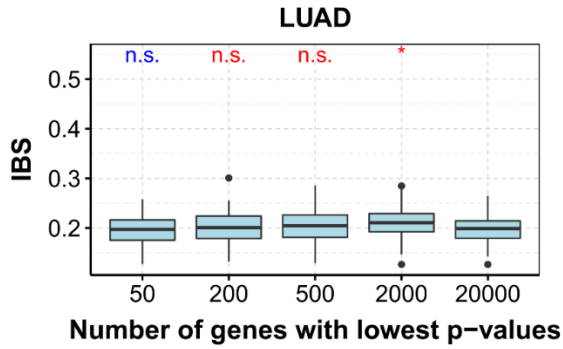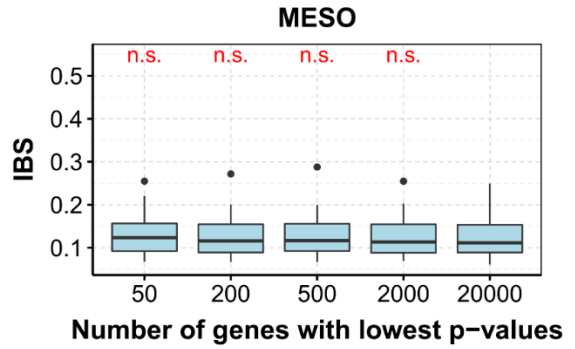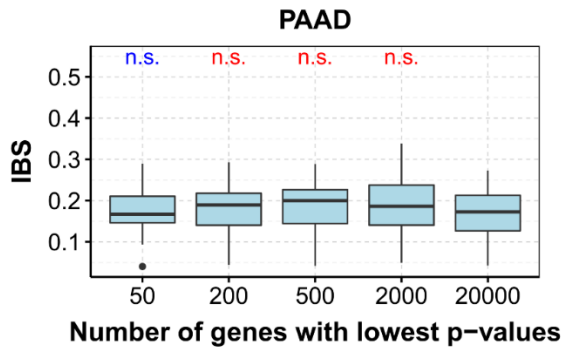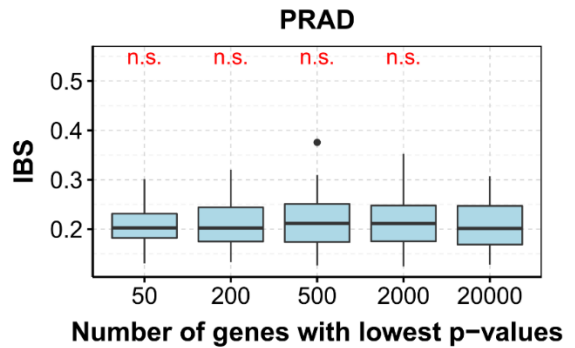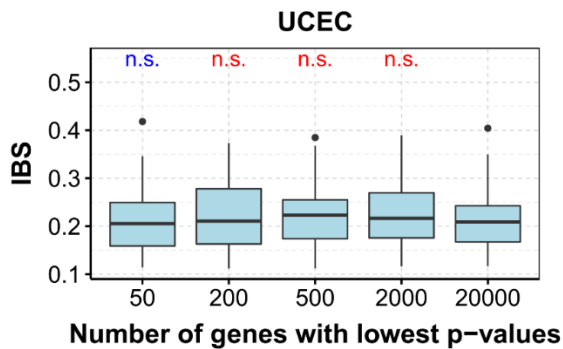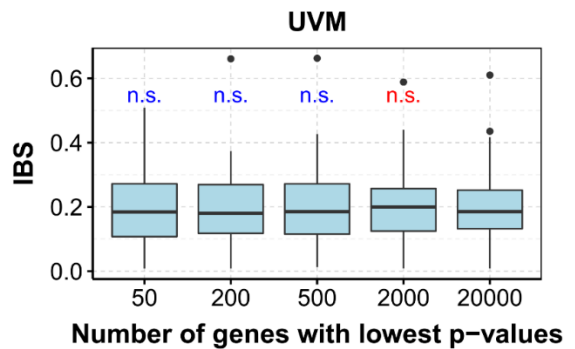

**Supplementary Fig. S23. IBS as a function of the number of genes with lowest univariate Cox model p-value used in the elastic net model.**

Procedure detailed in Figure 1. Bilateral test. Blue (resp. red) indications correspond to improved (degraded) median performance.

\*\*\*:  $p \leq 0.001$ , \*\*:  $p \leq 0.01$ , \*:  $p \leq 0.05$ , +:  $p \leq 0.1$ , n.s. :  $p > 0.1$
